# Supplementary material for: Trends in mental health service utilisation in immigrant youth in Ontario, Canada, 1996–2012: a population-based longitudinal cohort study
Source: PubMed Central journal article supplement — BMJ Open. 2018 Sep 17;8(9):e022647. doi: 10.1136/bmjopen-2018-022647 (PMC6144399; doi:10.1136/bmjopen-2018-022647), 2018-09-17
Supplement: bmjopen-2018-022647.draft_revisions.pdf [file bmjopen-2018-022647.draft_revisions.pdf]

# BMJ Open

BMJ Open is committed to open peer review. As part of this commitment we make the peer review history of every article we publish publicly available.

When an article is published we post the peer reviewers' comments and the authors' responses online. We also post the versions of the paper that were used during peer review. These are the versions that the peer review comments apply to.

The versions of the paper that follow are the versions that were submitted during the peer review process. They are not the versions of record or the final published versions. They should not be cited or distributed as the published version of this manuscript.

BMJ Open is an open access journal and the full, final, typeset and author-corrected version of record of the manuscript is available on our site with no access controls, subscription charges or pay-per-view fees (<http://bmjopen.bmj.com>).

If you have any questions on BMJ Open's open peer review process please email [info.bmjopen@bmj.com](mailto:info.bmjopen@bmj.com)

# BMJ Open

## Trends in mental health service utilization in immigrant youth in Ontario, Canada, 1996 to 2012: a population-based longitudinal cohort study.

|                               |                                                                                                                                                                                                                                                                                                                                                                                                                                                             |
|-------------------------------|-------------------------------------------------------------------------------------------------------------------------------------------------------------------------------------------------------------------------------------------------------------------------------------------------------------------------------------------------------------------------------------------------------------------------------------------------------------|
| Journal:                      | <i>BMJ Open</i>                                                                                                                                                                                                                                                                                                                                                                                                                                             |
| Manuscript ID                 | bmjopen-2018-022647                                                                                                                                                                                                                                                                                                                                                                                                                                         |
| Article Type:                 | Research                                                                                                                                                                                                                                                                                                                                                                                                                                                    |
| Date Submitted by the Author: | 27-Feb-2018                                                                                                                                                                                                                                                                                                                                                                                                                                                 |
| Complete List of Authors:     | Saunders, Natasha; Hospital for Sick Children, Pediatrics<br>Lebenbaum, Michael; Institute for Clinical Evaluative Sciences<br>Lu, Hong; Institute for Clinical Evaluative Sciences,<br>Stukel, Therese; Institute for Clinical Evaluative Sciences,<br>Urquia, Marcelo; University of Manitoba; St. Michael's Hospital<br>Guttman, Astrid; Institute for Clinical Evaluative Sciences, ; The Hospital<br>for Sick Children, Division of Pediatric Medicine |
| Keywords:                     | Organisation of health services < HEALTH SERVICES ADMINISTRATION & MANAGEMENT, MENTAL HEALTH, PAEDIATRICS, PUBLIC HEALTH                                                                                                                                                                                                                                                                                                                                    |
|                               |                                                                                                                                                                                                                                                                                                                                                                                                                                                             |

SCHOLARONE™  
Manuscripts

Peer Review Only

1  
2  
3 1 Trends in mental health service utilization in immigrant youth in Ontario, Canada, 1996 to 2012: a  
4 2 population-based longitudinal cohort study.

5 3  
6 4 Natasha Ruth Saunders, pediatrician<sup>1,2,3,4</sup>, Michael Lebenbaum, epidemiologist<sup>3</sup>, Hong Lu,  
7 5 biostatistician<sup>3</sup>, Therese A. Stukel, professor<sup>3,5</sup>, Marcelo Luis Urquia, professor<sup>3,5,6</sup>, and Astrid  
8 6 Guttman, pediatrician<sup>1,2,3,4,5</sup>  
9 7

10 8 **Affiliations:** <sup>1</sup>The Hospital for Sick Children, Toronto, Canada, <sup>2</sup>Department of Pediatrics,  
11 9 University of Toronto, Toronto, Canada; <sup>3</sup>Institute for Clinical Evaluative Sciences, Toronto,  
12 10 Canada; <sup>4</sup>Child Health Evaluative Sciences, Sickkids Research Institute, Toronto, Canada <sup>5</sup>Institute  
13 11 of Health Policy, Management and Evaluation, Dalla Lana School of Public Health, The University  
14 12 of Toronto, Toronto, Canada; <sup>6</sup>Centre for Research on Inner City Health, Li Ka Shing Knowledge  
15 13 Institute, St. Michael's Hospital, Toronto, ON, Canada.

16 14  
17 15 **Address correspondence to:** Natasha Saunders, natasha.saunders@sickkids.ca  
18 16 The Hospital for Sick Children 555 University Avenue, Toronto, Ontario M5G 1X8  
19 17 416-813-7654 x203076 (p), 416-813-5663 (f)  
20 18

21 19 **Short title:** Immigrant mental health trends over time.  
22 20

23 21 **Key words:** pediatrics, immigration, refugee, mental health, access  
24 22

25 23 **Funding Source:** This study was supported by the Institute for Clinical Evaluative Sciences  
26 24 (ICES), which is funded by an annual grant from the Ontario Ministry of Health and Long-Term  
27 25 Care (MOHLTC). The opinions, results, and conclusions reported in this paper are those of the  
28 26 authors and are independent from the funding sources. No endorsement by ICES or the Ontario  
29 27 MOHLTC is intended or should be inferred. Parts of this material are based on data and information  
30 28 compiled and provided by the Canadian Institute for Health Information (CIHI) and Immigration,  
31 29 Refugees and Citizenship Canada (IRCC). However, the analyses, conclusions, opinions and  
32 30 statements expressed herein are those of the authors, and not necessarily those of CIHI and IRCC.  
33 31 Astrid Guttman is funded through an Applied Chair in Child Health Services and Policy Research  
34 32 from the Canadian Institutes for Health Research (CIHR). Marcelo L. Urquia holds a CIHR New  
35 33 Investigator Award. Data cutting for this project and analysis was supported by the Ontario  
36 34 Ministry of Health and Long-Term Care.

37 35 **Financial Disclosure:** All authors have no financial relationships relevant to this article to disclose.  
38 36

39 37 **Conflict of Interest:** All authors have no conflicts of interest to disclose.  
40 38

41 39 **Transparency declaration:** N. Saunders affirms that the manuscript is an honest, accurate, and  
42 40 transparent account of the study being reported and no important aspects of the study have been  
43 41 omitted. Any discrepancies from the study as planned have been explained.  
44 42

45 43 **Data Sharing:** The authors confirm that all data underlying the findings are fully available without  
46 44 restriction. Data are available from the Institute for Clinical Evaluative Sciences (ICES)  
47 45 Institutional Data Access for researchers who meet the criteria for access to confidential data.  
48 46  
49 47  
50 48  
51 49  
52 50  
53 51  
54 52  
55 53  
56 54  
57 55  
58 56  
59 57  
60 58

1  
2  
3 46 Contact natasha.saunders@sickkids.ca for data access. Individual patient consent was not obtained  
4 47 but the presented data are anonymized and risk of identification is low.  
5 48

6 49 **Contributors' Statement:** N. Saunders conceptualized and designed the study, interpreted the  
7 50 results, drafted the initial manuscript, revised the manuscript, and approved the final manuscript as  
8 51 submitted. M. Lebenbaum, T. Stukel, M. Urquia, and A. Guttmann conceptualized and designed the  
9 52 study, interpreted the results, revised the manuscript, and approved the final manuscript as  
10 53 submitted. H. Lu conceptualized and designed the study, had access to and analysed the data,  
11 54 interpreted the results, revised the manuscript, and approved the final manuscript as submitted. All  
12 55 authors approved the final manuscript as submitted and agree to be accountable for all aspects of  
13 56 the work.  
14 57  
15 58  
16  
17  
18  
19 59  
20  
21  
22 60  
23  
24  
25 61  
26  
27  
28 62  
29  
30  
31 63  
32  
33  
34 64  
35  
36  
37  
38  
39  
40  
41  
42  
43  
44  
45  
46  
47  
48  
49  
50  
51  
52  
53  
54  
55  
56  
57  
58  
59  
60

1  
2  
3 65 **Abstract**

4  
5 66 **Objective:** To describe trends in mental health service use of youth by immigration status and  
6  
7 67 characteristics.

8  
9 68 **Design:** Population-based longitudinal cohort study from 1996 to 2012 using linked health and  
10  
11 69 administrative datasets.

12  
13  
14 70 **Setting:** Ontario, Canada.

15  
16 71 **Participants:** Youth 10 to 24 years, living in Ontario, Canada

17  
18 72 **Exposure.** The main exposure was immigration status (recent immigrants vs. long-term residents).  
19  
20  
21 73 Secondary exposures were region of origin and refugee status.

22  
23 74 **Main Outcome Measure:** Mental health hospitalizations, emergency department visits, and  
24  
25 75 outpatient visits within consecutive 3-year time periods. Poisson regression models estimated rate  
26  
27 76 ratios (RR).

28  
29  
30 77 **Results:** Over 2.5 million person years per period were included. Rates of recent immigrant mental  
31  
32 78 health service utilization were at least 40% lower than long-term residents ( $p<0.0001$ ). Mental  
33  
34 79 health hospitalization and emergency department visit rates increased in long-term residents  
35  
36 80 (hospitalizations, RR 1.09 (95% confidence intervals 1.08-1.09); emergency department visits, RR  
37  
38 81 1.15 (1.14-1.15)) and recent immigrants (hospitalizations RR 1.05 (1.03-1.07); emergency  
39  
40 82 department visits, RR 1.08 (1.05-1.11)). Mental health outpatient visit rates increased in long-term  
41  
42 83 residents (RR 1.03 (1.03-1.03)) but declined in recent immigrant (RR 0.94 (0.93-0.95)).

43  
44 84 Comparable divergent trends in acute care and outpatient service use were observed among  
45  
46 85 refugees and across most regions of origin. Recent immigrant acute care use was driven by longer-  
47  
48 86 term refugees (hospitalizations RR 1.12; (1.03-1.21); emergency department visits RR 1.11 (1.02-  
49  
50 87 1.20)).  
51  
52  
53  
54  
55  
56  
57  
58  
59  
60

1  
2  
3 88 **Conclusions:** Mental health service utilization was lower among recent immigrants than long-term  
4  
5 89 residents. While acute care use is increasing at a faster rate among long-term residents than recent  
6  
7 90 immigrants, the decrease in outpatient mental health visits in immigrants highlights a potential  
8  
9 91 emerging disparity in access to preventative care.  
10

11  
12 92 **Trial Registration:** Not Applicable.  
13  
14 93  
15  
16 94  
17  
18 95  
19  
20  
21  
22  
23  
24  
25  
26  
27  
28  
29  
30  
31  
32  
33  
34  
35  
36  
37  
38  
39  
40  
41  
42  
43  
44  
45  
46  
47  
48  
49  
50  
51  
52  
53  
54  
55  
56  
57  
58  
59  
60

1  
2  
3 96 **Strengths and Limitations of this Study:**  
4

- 5 97 • This is first population-based study to evaluate trends over time in mental health service use  
6  
7 98 in immigrant youth in Canada and the largest such study globally.  
8  
9 99 • Using individual linked health and demographic databases, we were able to obtain health  
10  
11 services use for a broad range of mental health disorders in a large population of youth.  
12 100  
13  
14 101 • The immigration database allowed a detailed level of information about immigration  
15  
16 102 characteristics and is also distinguished from other mental health studies among immigrants  
17  
18 103 which are often survey based, self-reported (and therefore under-reported) and have smaller  
19  
20 104 sample sizes.  
21  
22  
23 105 • Limitations include absence of information on mental health need, social support and  
24  
25 106 informal use of mental health services (e.g. religious leaders, social workers, community  
26  
27 107 support networks).  
28  
29  
30 108 • Data on psychologist, social work, and community mental health agency use are not  
31  
32 109 currently available for linking.  
33  
34  
35 110

## 111 **Introduction**

112 Mental health problems among youth contribute to significant morbidity and mortality across the  
113 globe, affecting one in five individuals.(1, 2) Recent population-based data suggests the burden of  
114 mental health problems among youth in Ontario, Canada is rising,(1) as is mental health service use  
115 in North America.(3, 4) Understanding trends over time in the utilization of mental health services  
116 is critical for optimal health service delivery. Accordingly, to make appropriately targeted health  
117 system improvements, identifying mental health trends in at-risk populations, including the growing  
118 population of immigrant youth, is important. This is increasingly becoming essential on an  
119 international scale given global migration and the current refugee crisis. Immigrants may face  
120 challenges integrating pre-migration social, cultural, and political experiences and post-migration  
121 resettlement stressors with their new lives as permanent residents or naturalized citizens. These  
122 experiences influence the complex set of factors that shape an immigrant's ability to access health  
123 services and their risk for mental health and addiction problems before, upon, and after arrival.(5-7)  
124 In Canada, approximately 20% of the population are 'landed immigrants' or 'permanent residents'  
125 (granted permission to live and work in Canada without limitations on one's stay). Of these, 85 to  
126 90% are skilled and educated workers, arriving as non-refugees.(8) Over the past two decades,  
127 shifts in immigration patterns to Canada have occurred. In particular, in recent years, there has  
128 been a relative increase in migration of South and East Asian populations with a simultaneous  
129 decline in immigrants from Eastern Europe and Central Asia.(8) These shifts are, in part, reflective  
130 of changes to Canadian immigration policy over time(9, 10) and indicative of changing drivers of  
131 global migration including political instability, economic opportunity, and family reunification.  
132 Changes to pre- and post-immigration exposures that may influence mental health service need,  
133 utilization, and access may accompany these variations in migration.



1  
2  
3 134 Existing literature on the epidemiology of mental health problems in immigrant youth is  
4  
5 135 inconsistent and typically based on smaller sub-sets of immigrants, most of which, rely on self-  
6  
7 136 report.(5, 6, 11-13) Social deprivation, common among immigrants, is often cited as a risk factor  
8  
9 137 for mental health problems(14, 15) but protective immigration factors may counter this risk.(16)  
10  
11  
12 138 One Danish population-based, administrative database study(17) showed higher rates of mental  
13  
14 139 health problems in immigrants compared with non-immigrants. This is in contrast to other  
15  
16 140 population-based North American and other European studies in both adolescents and adults where  
17  
18 141 there is a more pronounced 'healthy immigrant effect' – that is, individuals arrive in better health,  
19  
20 142 with lower rates of mental health problems, than their native-born counterparts.(7, 18, 19) This  
21  
22 143 may be due to differences in immigration policies in receiving countries that select for healthier,  
23  
24 144 more able-bodied individuals. Literature on the mental health of immigrant youth in Canada is  
25  
26 145 limited to a few small survey studies that suggest lower rates of mental health problems among  
27  
28 146 immigrants.(20, 21)  
29  
30  
31  
32 147 Despite the substantial proportion of health services concentrated on mental health care and  
33  
34 148 Canada's large and evolving immigrant population, little is known about the how mental health  
35  
36 149 service use has changed over time in immigrants. In this study, we aimed to describe the time trends  
37  
38 150 in mental health service utilization in recent immigrant youth in Ontario compared with long-term  
39  
40 151 residents. We also sought to describe these time trends among sub-groups of immigrants, including  
41  
42 152 by immigrant class, duration of residency in Canada, and region of origin. We hypothesized that  
43  
44 153 overall, immigrants would have lower utilization of the health care system for mental health  
45  
46 154 compared with long-term residents. However, we expected increasing rates of use in both recent  
47  
48 155 and long-term residents given widespread efforts in more recent years to reduce mental health  
49  
50 156 stigma and improve help-seeking behaviours.(22) We hypothesize that refugees, in particular,  
51  
52  
53  
54  
55  
56  
57  
58  
59  
60

1  
2  
3 157 would have an increasing trend in mental health use given the changes over time in Canada's  
4  
5 158 immigration policies that have shifted refugee selection to more at-risk populations.(9, 10)  
6

## 7 159 **Methods**

### 8 9 160 *Study Design*

10  
11  
12 161 This was a population-based longitudinal study using data available through a research agreement  
13  
14 162 between the Ontario Ministry of Health and Long-Term Care and the Institute for Clinical  
15  
16 163 Evaluative Sciences (ICES). The study was approved by the Research Ethics Board at Sunnybrook  
17  
18 164 Health Sciences Centre in Toronto, Ontario.

### 19 165 *Patient Involvement*

20  
21 166 Patients were not directly involved in this study.

### 22 23 167 *Data Collection*

24  
25  
26 168 Youth were identified using a unique, encoded, health identification number that linked several  
27  
28 169 health and administrative databases available at ICES to obtain study data. Immigrant status was  
29  
30 170 ascertained through the Ontario portion of the Immigration, Refugees and Citizenship Canada  
31  
32 171 (IRCC) Permanent Resident Database. The IRCC database contains individual level demographic  
33  
34 172 information from Ontario's permanent residents from 1985 to 2012.(9, 23) A number of  
35  
36 173 immigration characteristics were used from the database including immigrant visa class (refugee  
37  
38 174 versus non-refugee), duration of residence in Canada (based on the earlier of year of obtaining  
39  
40 175 permanent residency in Canada or the year of Ontario Health Insurance Plan (OHIP) eligibility),  
41  
42 176 and World Bank region of origin (based on the country of birth). The Registered Persons Database,  
43  
44 177 Ontario's universal health insurance registry, was used to obtain age and sex for every OHIP  
45  
46 178 eligible individual meeting study criteria. Emergency department (ED) visits were obtained  
47  
48 179 through the National Ambulatory Care Reporting System (NACRS) (2002-2012) and hospital  
49  
50 180 admissions were identified from the Canadian Institute for Health Information Discharge Abstract  
51  
52  
53  
54  
55  
56  
57  
58  
59

1  
2  
3 181 Database (CIHI-DAD) (1996-2012) and from the Ontario Mental Health Reporting System  
4  
5 182 (OMHRS) (2005-2012). To determine outpatient service use to physicians, mental health visits to  
6  
7 183 primary care physicians and psychiatrist outpatient visits were determined from the OHIP billings  
8  
9 184 database (1996-2012). In Ontario, residents are eligible for most hospital and physician services  
10  
11 185 through OHIP which acts as a single payer for the province. Immigrants with permanent resident  
12  
13 186 status are eligible if they have resided in Ontario for three months. Refugees with permanent  
14  
15 187 resident status may obtain OHIP coverage upon arrival.(24) Data from asylum-seekers (those  
16  
17 188 arriving in Canada and subsequently seeking refugee status) are not captured in the available  
18  
19 189 databases. Statistics Canada's Postal Code Conversion File was used to link patients' postal code at  
20  
21 190 the time of the visit to derive area level neighborhood income quintile and community size from the  
22  
23 191 1996, 2001, and 2006 Canadian Censuses.

### 28 192 *Study population*

29  
30 193 All youth ages 10 to 24 years who were eligible for OHIP during the study period from 1996 to  
31  
32 194 2012 were included. Cohorts were grouped into 3-year periods, except for the final two study  
33  
34 195 years, which were grouped as a 2-year period. Youth entered the study upon their 10<sup>th</sup> birthday and  
35  
36 196 exited on their 25<sup>th</sup> birthday. Those with an invalid encoded health number or missing sex were  
37  
38 197 excluded from the study. Non-Ontario residents at the onset of the study cohort period were also  
39  
40 198 excluded. Finally, individuals without an IRCC record (Canadian born or immigrants who moved  
41  
42 199 to Ontario from another province) who first became eligible for OHIP within 5 years of each cohort  
43  
44 200 period were excluded to reduce the possibility of unlinked IRCC records inappropriately being  
45  
46 201 included as Canadian born.

### 51 202 *Exposure variables*

52  
53 203 The main exposure was immigrant status, categorized as recent immigrant or long-term resident.  
54  
55 204 Recent immigrants were defined based on having an IRCC Permanent Resident Database record  
56  
57  
58  
59  
60

1  
2  
3 205 and a duration of residence in Ontario < 10 years. Long-term residents included all Canadian born  
4  
5 206 Ontario residents and individuals with an IRCC Permanent Resident Database record who had  
6  
7 207 landed in Canada  $\geq 10$  years from the start of the cohort period. Immigrant status was determined at  
8  
9 208 the beginning of each period. Thus, recent immigrants in one period could become long-term  
10  
11 209 residents in a subsequent period, so long as they maintained OHIP eligibility and study age criteria.  
12  
13

#### 14 210 *Covariates*

15  
16 211 A number of covariates were considered in the analysis. These included age, sex, neighborhood  
17  
18 212 income quintile within a dissemination area, and community size. Within recent immigrants,  
19  
20 213 covariates also included refugee status, duration of residency in Ontario (< 5 years and  $\geq 5$  to 10  
21  
22 214 years), region of origin based on modified World Bank Regions,(25) and the interaction between  
23  
24 215 duration of residency and refugee status, and between time with refugee status, duration of  
25  
26 216 residency, and region of birth.  
27  
28  
29

#### 30 217 *Outcome measures*

31  
32 218 The main outcome measure was mental health service utilization, within each time period.  
33  
34 219 Utilization was measured as all outpatient physician visits, ED visits and hospitalizations for a  
35  
36 220 mental health related problem. Outpatient physician mental health visits were identified using  
37  
38 221 OHIP billing codes and included visits to psychiatrists and visits to family physicians or  
39  
40 222 pediatricians where billing codes for mental health services or visits with a mental health diagnostic  
41  
42 223 code were used. This definition was based on a validated algorithm for ambulatory mental health  
43  
44 224 care modified by adding specific pediatric diagnostic codes.(26) These billings do not include  
45  
46 225 services provided by psychologists, social workers, and community-based non-physician mental  
47  
48 226 health services. ED visits were identified within NACRS where the main ED diagnosis was a  
49  
50 227 mental health disorder (F04-F99) or a secondary diagnosis was for self-inflicted injury (intentional  
51  
52 228 self-harm, X60-X84), both based on International Classification of Disease 9<sup>th</sup> and 10<sup>th</sup> edition  
53  
54  
55  
56  
57  
58  
59  
60

1  
2  
3 229 codes. Similarly, hospitalizations were identified as any hospitalization with a mental health  
4  
5 230 diagnostic code (F04-F99) captured in CIHI-DAD or any hospitalization to a provincially  
6  
7 231 designated mental health hospital bed identified within OMHRS, except for admissions for  
8  
9 232 dementia. See Appendix A for codes used to identify mental health visits.

### 11 233 *Analysis*

12  
13  
14 234 The total number of individuals, person years of exposure, and number and rate of events for each  
15  
16 235 cohort period were estimated. An unadjusted time trend for each outcome by immigrant status was  
17  
18 236 estimated. The interaction between immigrant status and time was tested and where significant,  
19  
20  
21 237 separate slopes for each exposure group were presented. A subgroup analysis on recent immigrants  
22  
23 238 was then performed to estimate an adjusted time trend for recent immigrant subgroups by region of  
24  
25 239 origin, refugee status, and duration of residence. The unit of analysis was the individual resident.  
26  
27  
28 240 Multivariable models were built for each outcome, adjusting for age, sex, income quintile, and  
29  
30 241 community size. All analyses were estimated using Poisson regression with Generalized Estimating  
31  
32 242 Equations using an independent correlation structure for outpatient and ED visits and autoregressive  
33  
34 243 correlation structure for hospitalizations. Results are presented as rate ratios (RR). Analyses were  
35  
36  
37 244 conducted with SAS Enterprise Guide, version 6.1 (SAS Institute Inc., Cary, NC).

### 38 245 **Results**

39  
40  
41 246 Approximately 2.5 to 2.9 million individuals contributed to each time period. Recent immigrants  
42  
43  
44 247 made up 9.8 to 11.5% of the cohort in each cohort period and refugees represented 17.7 to 18.0% of  
45  
46 248 recent immigrants. The regions of origin changed over time, initially with Europe and Central Asia  
47  
48  
49 249 as the leading regions, and more recently South and East Asia (Table I).

50  
51 250 Figure 1 shows the unadjusted time trends in rates of mental health service utilization in recent  
52  
53 251 immigrants and long-term residents. Mental health service utilization was much lower for  
54  
55 252 outpatient physician and acute care services in recent immigrants compared with long-term

1  
2  
3 253 residents (all rate ratios  $\leq 0.60$ ,  $p < 0.001$ ) (Table II). Both ED visits and hospitalizations rates  
4  
5 254 increased over time in recent immigrants and long-term residents but the increase in rates was  
6  
7 255 higher in long-term residents (Table II). Rates of outpatient physician visits for mental health  
8  
9 256 increased over time in long-term residents but decreased over time in recent immigrants (Table II).  
10  
11  
12 257 Low income and female sex were associated with an increased rate of mental health service use.  
13  
14 258 Late childhood and early adolescence was associated with a lower rate of mental health service use.  
15  
16 259 Urban individuals had the lowest rate of being admitted to hospital and the highest rate of using  
17  
18 260 outpatient physician mental health services.  
19  
20  
21 261 Within subgroups of immigrants, refugees had higher rates of ED visits and hospitalizations  
22  
23 262 compared with non-refugee recent immigrants and the recent increase in ED service use was driven  
24  
25 263 by refugees (Figure 2, Table III). The increase in hospitalization rates for mental health was  
26  
27 264 influenced primarily by refugees with a duration of residence of 5 to 10 years in Canada (Table III).  
28  
29  
30 265 Trends in outpatient physician visit rates among recent immigrants were similar by refugee status  
31  
32 266 and duration of residence in Canada (Figure 2, Table III).  
33  
34  
35 267 The unadjusted rates of mental health outpatient and ED visits and hospitalizations by region of  
36  
37 268 origin are shown in Figure 3 with adjusted rates in Table III. Across all regions, except Europe,  
38  
39 269 Central Asia, and North America, there were convergent trends in outpatient and acute care service  
40  
41 270 use for mental health conditions, with outpatient service use declining and acute care service use  
42  
43  
44 271 increasing over time.

## 46 272 **Discussion**

48  
49 273 This large population-based longitudinal study examined mental health service use over time in  
50  
51 274 recent immigrants and long-term residents in Ontario. Patterns of mental health service use over  
52  
53 275 time were consistently lower for outpatient physician and acute care mental health services by  
54  
55 276 recent immigrants compared with long-term residents. Rates of acute care mental health service use  
56  
57  
58  
59

1  
2  
3 277 increased over time in both groups but at a faster rate in long-term residents. Strikingly, outpatient  
4  
5 278 physician mental health service use increased over time in long-term residents but decreased in  
6  
7 279 recent immigrant groups. These discordant trends in outpatient and acute care mental health service  
8  
9 280 use were observed across both refugees and non-refugee immigrants and in immigrants from most  
10  
11 281 world regions.

12  
13  
14 282 Lower rates of mental health services use have also been observed in other large population-based  
15  
16 283 cross-sectional studies of Canadian adults(18, 27) and in smaller cohort studies across the globe(11,  
17  
18 284 28), though not consistently.(17) This variability in reported differences between mental health  
19  
20 285 burden in immigrant and native populations may be due to differences in immigration policies in  
21  
22 286 receiving countries. Some have attributed better mental health in immigrant populations to  
23  
24 287 selective migration for healthier individuals.(29, 30) This 'healthy immigrant effect' has been  
25  
26 288 observed for a number of adult conditions(31) but for few pediatric diseases(32, 33) and, to our  
27  
28 289 knowledge, has not been demonstrated in Canadian refugee youth. Lower rates of mental health  
29  
30 290 service use may be due to different care-seeking behaviours, with poor self-identification of mental  
31  
32 291 health problems or more internalizing problems in immigrant populations.(20)

33  
34  
35  
36  
37 292 In both recent immigrants and long-term residents, we found increases in ED visits and  
38  
39 293 hospitalizations over time. This may be a reflection of greater awareness and acceptance of mental  
40  
41 294 health problems in recent years from reduced stigma,(22) or formal strategies to improve access to  
42  
43 295 mental health services in the last several years in Ontario.(34, 35) The differential rates of increase  
44  
45 296 in acute care service use in these populations may be that strategies to improve mental health  
46  
47 297 services and reduce mental health stigma are not reaching all populations, in particular recent  
48  
49 298 immigrant youth. The increasing rate over time in acute care service use by refugees highlights the  
50  
51 299 importance of the vulnerability of this population and the need for active surveillance of  
52  
53  
54  
55  
56  
57  
58  
59

1  
2  
3 300 individuals, especially with the current global refugee crisis and changes to immigration policies  
4  
5 301 that select for a larger number of more vulnerable refugees.(9)

6  
7 302 The divergent trends in outpatient physician service use over time between study groups signals  
8  
9 303 emerging differences in health service delivery for recent immigrants. This may be a reflection of  
10  
11 304 different access to or availability of outpatient physician care or increasing stigma of mild mental  
12  
13 305 health problems among immigrants with consequent internalization of mental health problems.  
14  
15 306 Moreover, there may be a lack of familiarity with mental health services in certain immigrant  
16  
17 307 populations. Conversely, these finding may signify immigrants are increasingly receiving  
18  
19 308 alternative, non-physician mental health services though school based programs, community mental  
20  
21 309 health service agencies, or psychologists. The observed regional differences in outpatient trends,  
22  
23 310 with 'Western' regions having more similar trends to long-term Canadian residents, suggests  
24  
25 311 cultural congruency may be contributing to the observed findings. Equally, the observed  
26  
27 312 differences may be explained by a heavier reliance on informal supports from strong familial and  
28  
29 313 social networks in immigrant populations.(36) This latter notion could enhance strategies to  
30  
31 314 improve the mental health of high use populations, including those who are native-born.

### 32 33 34 35 36 37 315 *Strengths and Limitations*

38  
39 316 To our knowledge, this is the first study to evaluate trends over time in mental health service use in  
40  
41 317 immigrant youth in Canada and the largest such study globally. Using individual linked health and  
42  
43 318 demographic databases, we were able to obtain health services use for a broad range of mental  
44  
45 319 health disorders in a large population of youth. We had almost complete provincial data with  
46  
47 320 virtually no loss of individual records. The immigration database allowed a detailed level of  
48  
49 321 information about immigration characteristics. This study is also distinguished from other mental  
50  
51 322 health studies among immigrants which are often survey based, self-reported (and therefore under-  
52  
53 323 reported), have smaller sample sizes, and are largely focused on adults.  
54  
55  
56  
57  
58  
59  
60



1  
2  
3 324 Limitations to this study include absence of information on mental health need, social support and  
4  
5 325 informal use of mental health services (e.g. religious leaders, social workers, community support  
6  
7 326 networks). Data on psychologist, social work, and community mental health agency use are not  
8  
9 327 currently available for linking. These data would help contextualize our findings and allow us to  
10  
11 328 understand whether observed divergent trends are related to difficulty accessing physician care or  
12  
13 329 rather, determine if there are differential treatment-seeking behaviours by recent immigrants. Our  
14  
15 330 definition of mental health hospitalization did not include the small number of hospitalizations for  
16  
17 331 self-injury where there may have been co-existing mental illness but the injury itself was the  
18  
19 332 diagnosis most responsible for the length of stay. Our study did not include measures of clinical  
20  
21 333 comorbidities which may affect mental health service use. We did not have available primary care  
22  
23 334 data from community health centres which traditionally serve a higher proportion of immigrants  
24  
25 335 and marginalized populations.(37) However, community health centres in Ontario serve less than  
26  
27 336 1% of the population, of which 16% are newcomers.(37) In this study, we were not able to track  
28  
29 337 immigrants who entered Ontario from a different province, refugee claimants awaiting a decision  
30  
31 338 on residency, temporary residents, or 'non-status' residents. Finally, differential self-perceived  
32  
33 339 mental health status and cultural incongruence may lead to mis-diagnosis and therefore under-  
34  
35 340 reporting of mental health problems, by health care providers.

## 341 **Conclusions**

342 This large population-based longitudinal study of youth showed mental health acute care services  
343 are increasing over time in recent immigrant and long-term resident populations. However, there is  
344 an increasing difference in outpatient mental health service use with mental health outpatient  
345 physician visits decreasing in recent immigrant populations, despite an increased acute care service  
346 use over time. Future studies are needed to understand why these service differences exists to  
347 ensure recent immigrants in need of mental health services are identified and able to access needed

1  
2  
3 348 care. Understanding whether divergent trends are a reflection of difficulty accessing physician  
4  
5 349 mental health care or whether alternative models of mental health service delivery are serving these  
6  
7 350 populations is important. Development of strategies to reduce potential inequities in access and use  
8  
9 351 with an active effort to clarify the role of mental health services for recent immigrants are essential  
10  
11  
12 352 to ensuring equity in the provision of mental health service for all youth.

13  
14 353  
15  
16  
17  
18  
19  
20  
21  
22  
23  
24  
25  
26  
27  
28  
29  
30  
31  
32  
33  
34  
35  
36  
37  
38  
39  
40  
41  
42  
43  
44  
45  
46  
47  
48  
49  
50  
51  
52  
53  
54  
55  
56  
57  
58  
59  
60

**Table I.** OHIP eligible youth by period in Ontario

|                                    | 1996 to 1998 | 1999 to 2001 | 2002 to 2004 | 2005 to 2007 | 2008 to 2010 | 2011 to 2012 |
|------------------------------------|--------------|--------------|--------------|--------------|--------------|--------------|
| <b>Overall, N</b>                  | 2521439      | 2692524      | 2824820      | 2929879      | 2887553      | 2714188      |
| <b>Immigrant Status, %</b>         |              |              |              |              |              |              |
| Long-term residents                | 88.7         | 88.7         | 88.6         | 88.5         | 88.7         | 90.2         |
| Recent immigrants                  | 11.3         | 11.3         | 11.4         | 11.5         | 11.3         | 9.8          |
| <b>Age at Index (Years), %</b>     |              |              |              |              |              |              |
| 10-14                              | 45.6         | 46.1         | 45.7         | 44.5         | 43.4         | 38.9         |
| 15-19                              | 27.0         | 27.4         | 27.9         | 28.3         | 28.8         | 30.9         |
| 20-24                              | 27.4         | 26.4         | 26.3         | 27.2         | 27.9         | 30.2         |
| <b>Sex</b>                         |              |              |              |              |              |              |
| Female                             | 49.1         | 49.0         | 49.0         | 49           | 48.9         | 48.8         |
| Male                               | 50.9         | 51.0         | 51.0         | 51           | 51.5         | 51.2         |
| <b>Income Quintile, %</b>          |              |              |              |              |              |              |
| Income missing                     | 0.3          | 0.5          | 0.4          | 0.4          | 0.4          | 0.4          |
| Income quintile 1 (lowest)         | 20.0         | 20.5         | 20.0         | 21.0         | 20.0         | 19.4         |
| Income quintile 2                  | 19.3         | 19.9         | 19.6         | 19.7         | 19.3         | 18.9         |
| Income quintile 3                  | 19.8         | 19.8         | 19.8         | 19.4         | 19.7         | 19.8         |
| Income quintile 4                  | 20.3         | 19.4         | 20.0         | 19.5         | 20.4         | 20.9         |
| Income quintile 5                  | 20.3         | 20.0         | 20.1         | 20.0         | 20.3         | 20.5         |
| <b>Community Size, %</b>           |              |              |              |              |              |              |
| 1 500 000+                         | 45.9         | 40.5         | 41.6         | 42.5         | 43.3         | 43.7         |
| 500 000 – 1 499 999                | 5.6          | 12.1         | 12.1         | 12.1         | 12.2         | 12.3         |
| 100 000 – 499 999                  | 23.9         | 24.0         | 24.0         | 25.1         | 25.1         | 25.2         |
| 10 000 – 99 999                    | 9.1          | 9.6          | 9.2          | 8.2          | 7.8          | 7.6          |
| < 10 000                           | 15.6         | 13.8         | 13.2         | 12           | 11.5         | 11.2         |
| <b>Immigration characteristics</b> |              |              |              |              |              |              |
| <b>N</b>                           | 284150       | 304991       | 322173       | 337163       | 326556       | 265061       |
| <b>Refugee Status, %</b>           |              |              |              |              |              |              |
| Non-refugee, 0-5 years             | 58.5         | 54.7         | 53.7         | 55.4         | 49.4         | 41.5         |
| Non-refugee, ≥5-10 years           | 23.8         | 27.5         | 28.4         | 26.9         | 32.6         | 39.9         |
| Refugees, 0-5 years                | 12.4         | 11.1         | 12.5         | 12.7         | 12.5         | 11.2         |
| Refugees, ≥5-10 years              | 5.3          | 6.6          | 5.4          | 5.0          | 5.5          | 7.5          |
| <b>Region of Birth, %</b>          |              |              |              |              |              |              |
| East Asia & Pacific                | 22.1         | 21.4         | 21.6         | 22.9         | 23.6         | 24.7         |
| Europe & C. Asia                   | 23.4         | 22.0         | 18.3         | 15.8         | 14.0         | 11.6         |
| L.A. & Caribbean                   | 18.5         | 15.3         | 13.4         | 11.5         | 11.4         | 11.5         |
| Mid East & N. Africa               | 9.2          | 10.5         | 11.4         | 12.5         | 13.2         | 14.3         |
| North America                      | 2.0          | 1.9          | 2.0          | 2.3          | 2.9          | 3.4          |
| South Asia                         | 17.7         | 21.7         | 26.0         | 28.2         | 28.1         | 27.4         |
| Sub-Saharan Africa                 | 7.1          | 7.0          | 7.2          | 6.8          | 6.8          | 7.1          |

354

355

**Table II.** Multivariable Poisson regression models for rates of mental health hospitalizations, emergency department visits and outpatient physician visits by immigration status and over time.

|                                                                                                                                                           | <b>Hospitalizations</b> | <b>Emergency department visits</b> | <b>Outpatient physician visits</b> |
|-----------------------------------------------------------------------------------------------------------------------------------------------------------|-------------------------|------------------------------------|------------------------------------|
| <b>Parameter</b>                                                                                                                                          | <b>RR (95% CI)</b>      | <b>RR (95% CI)</b>                 | <b>RR (95% CI)</b>                 |
| <b>Immigration Status</b> (Reference: Long-term residents)                                                                                                |                         |                                    |                                    |
| Recent immigrants                                                                                                                                         | 0.60 (0.56, 0.64)       | 0.49 (0.47, 0.52)                  | 0.60 (0.59, 0.61)                  |
| <b>Relative change per time period</b> (Reference period 1996-1998 for hospitalizations and outpatient visits, 2002-2004 for emergency department visits) |                         |                                    |                                    |
| Time trend – Recent immigrant                                                                                                                             | 1.05 (1.03, 1.07)       | 1.08 (1.05, 1.11)                  | 0.94 (0.93, 0.95)                  |
| Time trend – Long-term resident                                                                                                                           | 1.09 (1.08, 1.09)       | 1.15 (1.14, 1.15)                  | 1.03 (1.03, 1.03)                  |
| <b>Sex</b> (Reference: female)                                                                                                                            |                         |                                    |                                    |
| Male                                                                                                                                                      | 0.89 (0.87, 0.91)       | 0.80 (0.79, 0.82)                  | 0.85 (0.84, 0.85)                  |
| <b>Age</b> (Reference: 20 to 24 years)                                                                                                                    |                         |                                    |                                    |
| Age: 10 to 14 years                                                                                                                                       | 0.52 (0.51, 0.53)       | 0.43 (0.43, 0.44)                  | 0.49 (0.48, 0.49)                  |
| Age: 15 to 19 years                                                                                                                                       | 0.99 (0.98, 1.01)       | 1.11 (1.09, 1.12)                  | 0.75 (0.74, 0.75)                  |
| <b>Income</b> (Reference quintile 5)                                                                                                                      |                         |                                    |                                    |
| Income missing                                                                                                                                            | 1.98 (1.78, 2.21)       | 2.12 (1.97, 2.29)                  | 1.05 (0.99, 1.12)                  |
| Income quintile 1 (lowest)                                                                                                                                | 1.36 (1.32, 1.40)       | 1.62 (1.59, 1.65)                  | 1.03 (1.02, 1.04)                  |
| Income quintile 2                                                                                                                                         | 1.19 (1.16, 1.22)       | 1.32 (1.30, 1.35)                  | 0.95 (0.94, 0.96)                  |
| Income quintile 3                                                                                                                                         | 1.08 (1.05, 1.11)       | 1.16 (1.13, 1.18)                  | 0.91 (0.90, 0.92)                  |
| Income quintile 4                                                                                                                                         | 1.04 (1.01, 1.07)       | 1.07 (1.05, 1.09)                  | 0.90 (0.89, 0.91)                  |
| <b>Community size</b> (Reference: 1 500 000+)                                                                                                             |                         |                                    |                                    |
| 500 000 – 1 499 999                                                                                                                                       | 0.95 (0.92, 0.99)       | 1.46 (1.42, 1.50)                  | 1.09 (1.08, 1.10)                  |
| 100 000 – 499 999                                                                                                                                         | 1.33 (1.30, 1.36)       | 1.60 (1.57, 1.63)                  | 1.03 (1.03, 1.04)                  |
| 10 000 – 99 999                                                                                                                                           | 1.55 (1.50, 1.60)       | 1.98 (1.94, 2.03)                  | 0.94 (0.93, 0.96)                  |
| < 10 000                                                                                                                                                  | 1.23 (1.19, 1.27)       | 1.81 (1.77, 1.84)                  | 0.74 (0.74, 0.76)                  |

356

357

**Table III.** Multivariable Poisson regression models for time trends in mental health hospitalizations, emergency department visits, and outpatient physician visits within recent immigrant groups.

|                                    | <b>Hospitalizations</b> | <b>Emergency department visits</b> | <b>Outpatient physician visits</b> |
|------------------------------------|-------------------------|------------------------------------|------------------------------------|
| <b>Parameter</b>                   | <b>RR (95% CI)</b>      | <b>RR (95% CI)</b>                 | <b>RR (95% CI)</b>                 |
| <b>Immigration Class</b>           |                         |                                    |                                    |
| Non-refugees, 0 to 5 years         | 1.04 (1.01, 1.07)       | 1.04 (1.00, 1.07)                  | 0.93 (0.92, 0.94)                  |
| Non-refugees, $\geq 5$ to 10 years | 1.01 (0.97, 1.05)       | 1.05 (1.01, 1.10)                  | 0.93 (0.92, 0.94)                  |
| Refugees, 0 to 5 years             | 1.02 (0.97, 1.08)       | 1.14 (1.07, 1.22)                  | 0.95 (0.93, 0.96)                  |
| Refugees, $\geq 5$ to 10 years     | 1.12 (1.03, 1.21)       | 1.11 (1.02, 1.20)                  | 0.95 (0.93, 0.97)                  |
| <b>Region of Origin</b>            |                         |                                    |                                    |
| East Asia and Pacific              | 1.02 (0.97, 1.07)       | 1.10 (1.04, 1.17)                  | 0.93 (0.92, 0.94)                  |
| South Asia                         | 1.05 (1.00, 1.11)       | 1.08 (1.02, 1.14)                  | 0.92 (0.91, 0.94)                  |
| Sub-Saharan Africa                 | 1.04 (0.97, 1.11)       | 1.10 (1.00, 1.20)                  | 0.89 (0.87, 0.91)                  |
| Middle East and North Africa       | 0.98 (0.91, 1.05)       | 1.05 (0.98, 1.11)                  | 0.96 (0.94, 0.98)                  |
| Latin America and Caribbean        | 1.08 (1.03, 1.13)       | 1.12 (1.06, 1.18)                  | 0.95 (0.94, 0.97)                  |
| Europe and Central Asia            | 1.17 (1.11, 1.24)       | 1.16 (1.10, 1.22)                  | 1.01 (0.99, 1.03)                  |
| North America                      | 1.00 (0.89, 1.14)       | 0.92 (0.76, 1.13)                  | 0.96 (0.91, 1.01)                  |
| Long-term Residents                | 1.09 (1.08, 1.09)       | 1.15 (1.14, 1.15)                  | 1.03 (1.03, 1.03)                  |

358

359

1  
2  
3 360 **Figure 1.** Acute care and outpatient physician visits for mental health problems over time by time  
4  
5 361 period in recent immigrants and long-term residents. (RR) Rate Ratio (CI) Confidence Interval  
6  
7 362 (ED) Emergency Department.  
8

9 363  
10  
11  
12 364 **Figure 2.** Acute care and outpatient visits for mental health problems over time by time period by  
13  
14 365 immigration class and recency of immigration. (ED) Emergency Department.  
15

16 366  
17  
18  
19 367 **Figure 3.** Acute care and outpatient mental health service use by time period and by region of  
20  
21 368 origin. (ED) Emergency Department.  
22

23  
24 369  
25  
26 370  
27  
28  
29 371  
30  
31 372  
32  
33  
34  
35  
36  
37  
38  
39  
40  
41  
42  
43  
44  
45  
46  
47  
48  
49  
50  
51  
52  
53  
54  
55  
56  
57  
58  
59  
60

1  
2  
3 **373 Abbreviations:**

4  
5 374 (CI) Confidence interval; (CIHI-DAD) Canadian Institute for Health Information Discharge

6  
7 375 Abstract Database; (ED) Emergency department; (ICES) Institute for Clinical Evaluative Sciences;

8  
9 376 (IRCC) Immigration, Refugees and Citizenship Canada; (LTR) Long-term resident; (NACRS)

10  
11 377 National Ambulatory Care Reporting System; (OHIP) Ontario Health Insurance Plan; (OMHRS)

12  
13  
14 378 Ontario Mental Health Reporting System; (RI) Recent immigrants; (RR) Rate ratio.

15  
16 379

17  
18  
19  
20  
21  
22  
23  
24  
25  
26  
27  
28  
29  
30  
31  
32  
33  
34  
35  
36  
37  
38  
39  
40  
41  
42  
43  
44  
45  
46  
47  
48  
49  
50  
51  
52  
53  
54  
55  
56  
57  
58  
59  
60

For peer review only

**References**

1. The Mental Health of Children and Youth in Ontario: A Baseline Scorecard. Toronto, ON: Institute for Clinical Evaluative Sciences, 2015.
2. Waddell C, Shepherd CA, Schwartz C, Barican J. Child and Youth Mental Disorders: Prevalence and Evidence-Based Interventions. Vancouver, BC: Children's Health Policy Centre, British Columbia Ministry of Children and Family Development, 2014.
3. Mapelli E, Black T, Doan Q. Trends in Pediatric Emergency Department Utilization for Mental Health-Related Visits. *The Journal of pediatrics*. 2015;167(4):905-10.
4. Olfson M, Druss BG, Marcus SC. Trends in mental health care among children and adolescents. *N Engl J Med*. 2015;372(21):2029-38.
5. Beiser M, Goodwill AM, Albanese P, McShane K, Nowakowski M. Predictors of immigrant children's mental health in Canada: selection, settlement contingencies, culture, or all of the above? *Social psychiatry and psychiatric epidemiology*. 2014;49(5):743-56.
6. Beiser M, Zilber N, Simich L, Youngmann R, Zohar AH, Taa B, et al. Regional effects on the mental health of immigrant children: results from the New Canadian Children and Youth Study (NCCYS). *Health & place*. 2011;17(3):822-9.
7. Beiser M, Hou F, Hyman I, Tousignant M. Poverty, family process, and the mental health of immigrant children in Canada. *American journal of public health*. 2002;92(2):220-7.
8. Facts and figures 2013. Immigration overview – permanent and temporary residents. : Citizenship and Immigration Canada; 2013 [cited 2016 July 19th]. Available from: <http://www.cic.gc.ca/english/resources/statistics/facts2013/index.asp>.
9. Immigration and Refugee Protection Act. Government of Canada; 2001.
10. Bragg B. A Guide to Canada's Changing Immigration Policy. Calgary, AB: Ethno-Cultural Council of Calgary., 2013.



- 1  
2  
3 404 11. deKeyser L, Svedin CG, Agnafors S, Bladh M, Sydsjo G. Multi-informant reports of mental  
4  
5 405 health in Swedish-born children of immigrants and children born to non-immigrants - the SESBiC-  
6  
7 406 study. *BMC pediatrics*. 2014;14:95.  
8  
9 407 12. Huang ZJ, Yu SM, Ledsky R. Health status and health service access and use among  
10  
11 408 children in U.S. immigrant families. *American journal of public health*. 2006;96(4):634-40.  
12  
13  
14 409 13. Vollebergh WA, ten Have M, Dekovic M, Oosterwegel A, Pels T, Veenstra R, et al. Mental  
15  
16 410 health in immigrant children in the Netherlands. *Social psychiatry and psychiatric epidemiology*.  
17  
18 411 2005;40(6):489-96.  
19  
20  
21 412 14. Akhtar-Danesh N, Landeen J. Relation between depression and sociodemographic factors.  
22  
23 413 *International journal of mental health systems*. 2007;1(1):4.  
24  
25  
26 414 15. Lofors J, Ramirez-Leon V, Sundquist K. Neighbourhood income and anxiety: a study based  
27  
28 415 on random samples of the Swedish population. *European journal of public health*. 2006;16(6):633-  
29  
30 416 9.  
31  
32 417 16. Fazel M, Reed RV, Panter-Brick C, Stein A. Mental health of displaced and refugee  
33  
34 418 children resettled in high-income countries: risk and protective factors. *The Lancet*.  
35  
36 419 2012;379(9812):266-82.  
37  
38  
39 420 17. Cantor-Graae E, Pedersen CB. Full spectrum of psychiatric disorders related to foreign  
40  
41 421 migration: a Danish population-based cohort study. *JAMA psychiatry*. 2013;70(4):427-35.  
42  
43  
44 422 18. Durbin A, Moineddin R, Lin E, Steele LS, Glazier RH. Mental health service use by recent  
45  
46 423 immigrants from different world regions and by non-immigrants in Ontario, Canada: a cross-  
47  
48 424 sectional study. *BMC health services research*. 2015;15:336.  
49  
50  
51 425 19. Ivert AK, Merlo J, Svensson R, Levander MT. How are immigrant background and gender  
52  
53 426 associated with the utilisation of psychiatric care among adolescents? *Soc Psychiatry Psychiatr*  
54  
55 427 *Epidemiol*. 2013;48(5):693-9.  
56  
57  
58  
59  
60

- 1  
2  
3 428 20. Kwak K, Rudmin F. Adolescent health and adaptation in Canada: examination of gender  
4  
5 429 and age aspects of the healthy immigrant effect. *Int J Equity Health*. 2014;13(1):103.  
6  
7 430 21. Hansson EK, Tuck A, Lurie S, McKenzie K. Rates of mental illness and suicidality in  
8  
9 431 immigrant, refugee, ethnocultural, and racialized groups in Canada: a review of the literature.  
10  
11 432 *Canadian journal of psychiatry Revue canadienne de psychiatrie*. 2012;57(2):111-21.  
13  
14 433 22. Pietrus M. *Opening Minds Interim Report*. Calgary, AB: Mental Health Commission of  
15  
16 434 Canada, 2013.  
17  
18 435 23. Data Dictionary Toronto: Institute for Clinical Evaluative Sciences; [April 11th, 2016].  
19  
20 436 Available from:  
21  
22 437 <https://datadictionary.ices.on.ca/Applications/DataDictionary/Library.aspx?Library=CIC>.  
23  
24 438 24. Ontario Health Insurance Act: Ontario Ministry of Health and Long-Term Care; 2015  
25  
26 439 [November 13, 2015]. Available from: <http://www.ontario.ca/laws/regulation/900552>.  
27  
28 440 25. The World Bank Regions 2015 [November 13, 2015]. Available from:  
29  
30 441 <http://www.worldbank.org/en/about/annual-report/regions>.  
31  
32 442 26. Steele LS, Glazier RH, Lin E, Evans M. Using administrative data to measure ambulatory  
33  
34 443 mental health service provision in primary care. *Medical care*. 2004;42(10):960-5.  
35  
36 444 27. Durbin A, Lin E, Moineddin R, Steele LS, Glazier RH. Use of mental health care for  
37  
38 445 nonpsychotic conditions by immigrants in different admission classes and by refugees in Ontario,  
39  
40 446 Canada. *Open Medicine*. 2014;8(4):e136.  
41  
42 447 28. Huang KY, Calzada E, Cheng S, Brotman LM. Physical and mental health disparities  
43  
44 448 among young children of Asian immigrants. *The Journal of pediatrics*. 2012;160(2):331-6 e1.  
45  
46 449 29. Kim IH, Carrasco C, Muntaner C, McKenzie K, Noh S. Ethnicity and postmigration health  
47  
48 450 trajectory in new immigrants to Canada. *American journal of public health*. 2013;103(4):e96-104.  
49  
50  
51  
52  
53  
54  
55  
56  
57  
58  
59

- 1  
2  
3 451 30. Durbin A, Moineddin R, Lin E, Steele LS, Glazier RH. Examining the relationship between  
4  
5 452 neighbourhood deprivation and mental health service use of immigrants in Ontario, Canada: a  
6  
7 453 cross-sectional study. *BMJ open*. 2015;5(3):e006690.  
8  
9 454 31. Osypuk TL, Alonso A, Bates LM. Understanding the Healthy Immigrant Effect and  
10  
11 455 Cardiovascular Disease: Looking to Big Data and Beyond. *Circulation*. 2015;132(16):1522-4.  
12  
13  
14 456 32. Urquia ML, Frank JW, Glazier RH. From places to flows. *International secondary migration*  
15  
16 457 and birth outcomes. *Social science & medicine*. 2010;71(9):1620-6.  
17  
18 458 33. Guttman A, Manuel D, Stukel TA, Desmeules M, Cernat G, Glazier RH. Immunization  
19  
20 459 coverage among young children of urban immigrant mothers: findings from a universal health care  
21  
22 460 system. *Ambul Pediatr*. 2008;8(3):205-9.  
23  
24  
25 461 34. Open minds, healthy minds: Ontario's Comprehensive Mental Health and Addictions  
26  
27 462 Strategy.: Government of Ontario; 2011 [cited 2015 November 13th, ]. Available from:  
28  
29 463 [http://www.health.gov.on.ca/en/common/ministry/publications/reports/mental\\_health2011/mentalhe](http://www.health.gov.on.ca/en/common/ministry/publications/reports/mental_health2011/mentalhe)  
30  
31 464 [alth.aspx](http://www.health.gov.on.ca/en/common/ministry/publications/reports/mental_health2011/mentalhealth.aspx).  
32  
33  
34 465 35. A shared responsibility: Ontario's policy framework for child and youth mental health.:  
35  
36 466 Ontario Ministry of Children and Youth Services; 2006 [cited 2015 November 13, 2015]. Available  
37  
38 467 from:  
39  
40 468 [http://www.children.gov.on.ca/htdocs/English/topics/specialneeds/mentalhealth/sharedresponsibilit](http://www.children.gov.on.ca/htdocs/English/topics/specialneeds/mentalhealth/sharedresponsibility.aspx)  
41  
42 469 [y.aspx](http://www.children.gov.on.ca/htdocs/English/topics/specialneeds/mentalhealth/sharedresponsibility.aspx).  
43  
44  
45 470 36. Puyat JH. Is the influence of social support on mental health the same for immigrants and  
46  
47 471 non-immigrants? *Journal of immigrant and minority health / Center for Minority Public Health*.  
48  
49 472 2013;15(3):598-605.  
50  
51  
52  
53  
54  
55  
56  
57  
58  
59  
60

1  
2  
3 473 37. Glazier R, Zagorski B, Rayner J. Comparison of Primary Care Models in Ontario by  
4  
5 474 Demographics, Case Mix and Emergency Department Use, 2008/09 to 2009/10. ICES Investigative  
6  
7 475 Report. Toronto: Institute for Clinical Evaluative Sciences, 2012.  
8

9  
10 476  
11  
12  
13  
14  
15  
16  
17  
18  
19  
20  
21  
22  
23  
24  
25  
26  
27  
28  
29  
30  
31  
32  
33  
34  
35  
36  
37  
38  
39  
40  
41  
42  
43  
44  
45  
46  
47  
48  
49  
50  
51  
52  
53  
54  
55  
56  
57  
58  
59  
60

For peer review only

## Appendix A

**Medical record codes used to identify mental health visits to outpatient physicians, emergency departments, and hospitals in Ontario, 1996 to 2012.**

### Outpatient Mental Health Diagnostic Codes from the Ontario Health Insurance Plan

Any office-based visit to a psychiatrist or any office based visit to a family practitioner or pediatrician with any mental health counselling code or a service code with any of the following diagnoses:

| <i>Code</i> | <i>Diagnosis</i>                                                                               |
|-------------|------------------------------------------------------------------------------------------------|
| 291         | Alcoholic psychosis, delirium tremens, Korsakov's psychosis                                    |
| 292         | Drug psychosis                                                                                 |
| 295         | Schizophrenia                                                                                  |
| 296         | Manic-depressive psychoses, involuntional melancholia                                          |
| 297         | Other paranoid states                                                                          |
| 298         | Other psychoses                                                                                |
| 299         | Child Psychoses (e.g. Autism)                                                                  |
| 300         | Anxiety neurosis, hysteria, neurasthenia, obsessive-compulsive neurosis, reactive depression   |
| 301         | Personality disorders                                                                          |
| 302         | Sexual deviations                                                                              |
| 303         | Alcoholism                                                                                     |
| 304         | Drug dependence                                                                                |
| 305         | Tobacco abuse                                                                                  |
| 306         | Psychosomatic illness                                                                          |
| 307         | Habit spasms, tics, stuttering, tension headaches, anorexia nervosa, sleep disorders, enuresis |
| 309         | Adjustment reaction                                                                            |
| 311         | Depressive disorder                                                                            |
| 313         | Behaviour disorders of childhood and adolescence                                               |
| 314         | Hyperkinetic syndrome of childhood                                                             |
| 897         | Economic problems                                                                              |
| 898         | Marital difficulties                                                                           |
| 899         | Parent-child problems                                                                          |
| 900         | Problems with aged parents or in-laws                                                          |
| 901         | Family disruption/divorce                                                                      |
| 902         | Education problems                                                                             |
| 904         | Social maladjustment                                                                           |
| 905         | Occupational problems                                                                          |
| 906         | Legal problems                                                                                 |
| 909         | Other problems of social adjustment                                                            |

### **Mental Health Diagnoses and Codes for Emergency Department Discharges**

| <u>Year (s)</u> | <u>Codes Type</u> | <u>Variable</u> | <u>Code</u>                        |
|-----------------|-------------------|-----------------|------------------------------------|
| 2001 – 2002     | ICD-9-CA          | Main Diagnosis  | 290 – 319 (except 290.X and 294.X) |
| OR              |                   |                 |                                    |
| 2001 – 2002     | ICD-9-CA          | Any Diagnosis   | E950-E959                          |
| 2002 - 2012     | ICD-10-CA         | Main Diagnosis  | F04 – F99                          |
| OR              |                   |                 |                                    |
| 2002 – 2012     | ICD-10-CA         | Any Diagnosis   | X60 - 84                           |

### **Mental Health Diagnoses and Codes for Mental Health Hospitalizations**

Any hospitalization to a designated mental health hospital bed or any hospitalization where:

| <u>Year (s)</u> | <u>Codes Type</u> | <u>Variable</u>            | <u>Code</u>                        |
|-----------------|-------------------|----------------------------|------------------------------------|
| 1996 – 2002     | ICD-9-CA          | Most Responsible Diagnosis | 290 – 319 (except 290.X and 294.X) |
| 2002-2012       | ICD-10-CA         | Most Responsible Diagnosis | F04 – F99                          |

1  
2  
3  
4  
5  
6  
7  
8  
9  
10  
11  
12  
13  
14  
15  
16  
17  
18  
19  
20  
21  
22  
23  
24  
25  
26  
27  
28  
29  
30  
31  
32  
33  
34  
35  
36  
37  
38  
39  
40  
41  
42  
43  
44  
45  
46  
47  
48  
49  
50  
51  
52  
53  
54  
55  
56  
57  
58  
59  
60

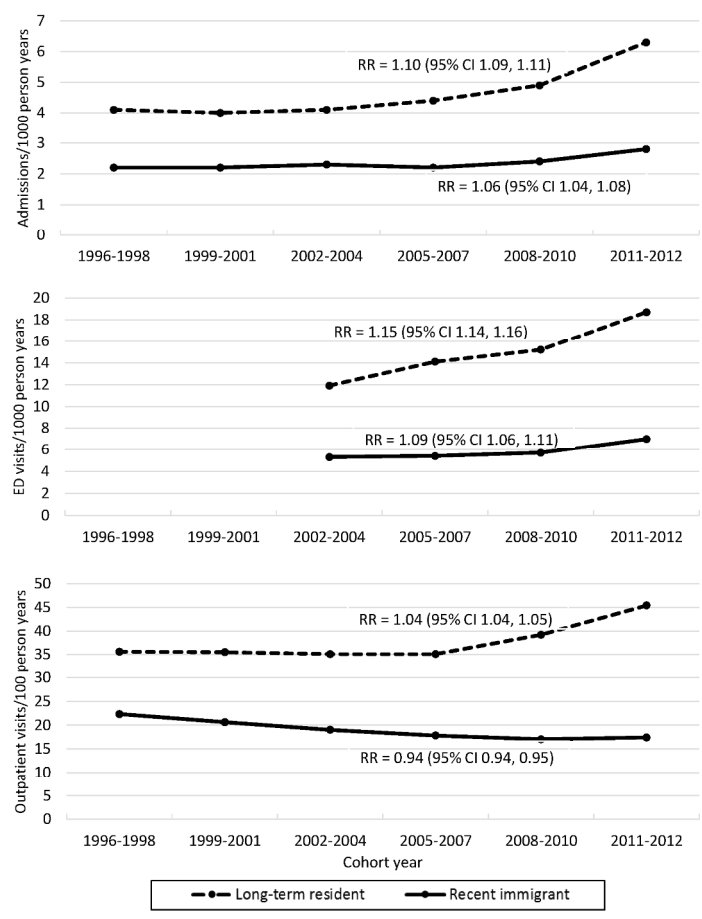

Figure 1. Acute care and outpatient physician visits for mental health problems over time by time period in recent immigrants and long-term residents. (RR) Rate Ratio (CI) Confidence Interval (ED) Emergency Department.

215x279mm (300 x 300 DPI)

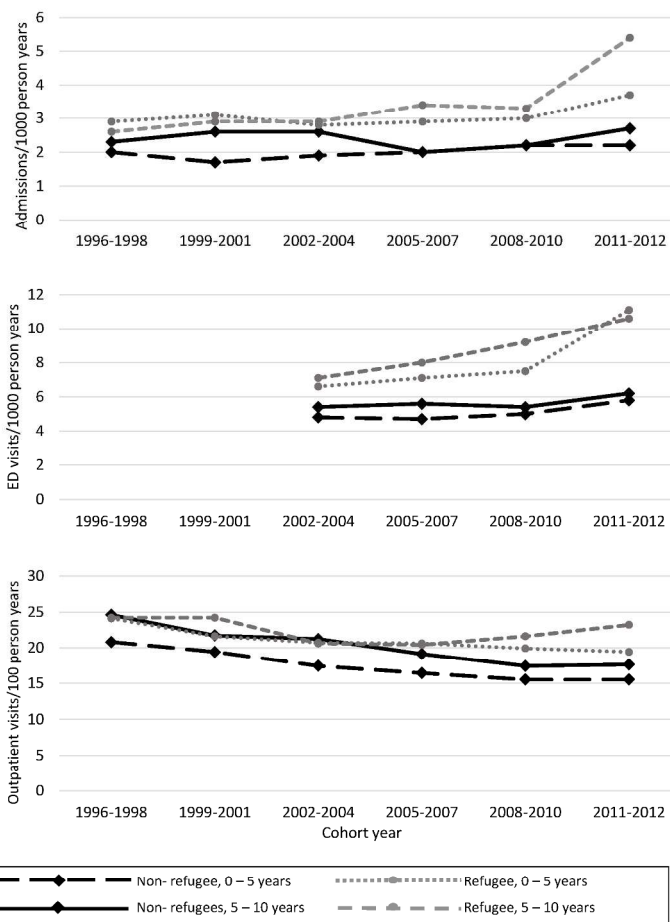

Figure 2. Acute care and outpatient visits for mental health problems over time by time period by immigration class and recency of immigration. (ED) Emergency Department.

215x279mm (300 x 300 DPI)



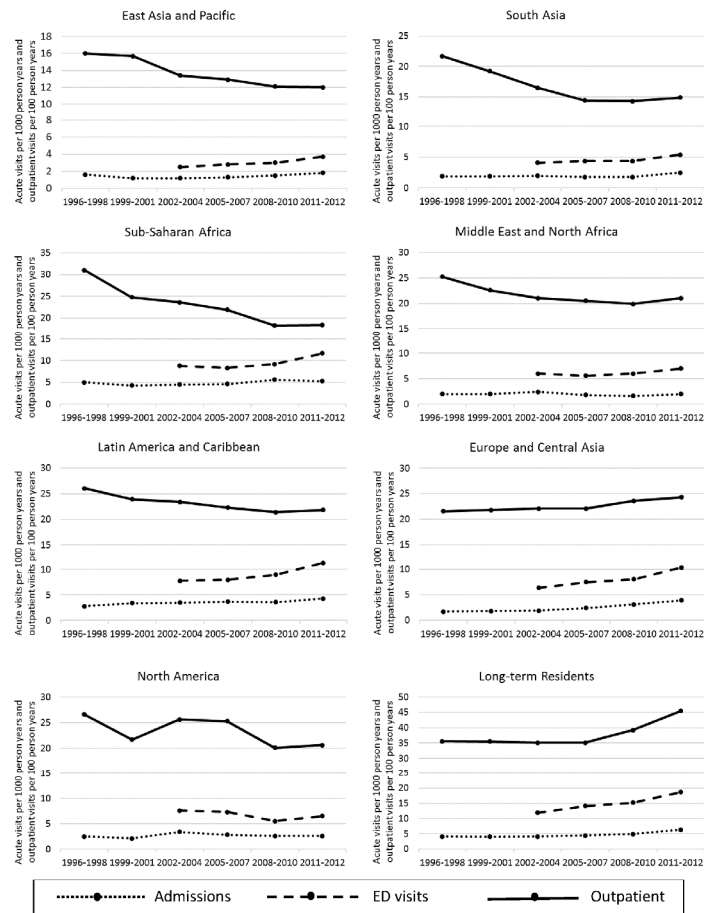

Figure 3. Acute care and outpatient mental health service use by time period and by region of origin. (ED) Emergency Department.

215x279mm (300 x 300 DPI)

**The RECORD statement – checklist of items, extended from the STROBE statement, that should be reported in observational studies using routinely collected health data.**

|                           | Item No. | STROBE items                                                                                                                                                                               | Location in manuscript where items are reported | RECORD items                                                                                                                                                                                                                                                                                                                                                                                                                                | Location in manuscript where items are reported |
|---------------------------|----------|--------------------------------------------------------------------------------------------------------------------------------------------------------------------------------------------|-------------------------------------------------|---------------------------------------------------------------------------------------------------------------------------------------------------------------------------------------------------------------------------------------------------------------------------------------------------------------------------------------------------------------------------------------------------------------------------------------------|-------------------------------------------------|
| <b>Title and abstract</b> |          |                                                                                                                                                                                            |                                                 |                                                                                                                                                                                                                                                                                                                                                                                                                                             |                                                 |
|                           | 1        | (a) Indicate the study's design with a commonly used term in the title or the abstract (b) Provide in the abstract an informative and balanced summary of what was done and what was found | Page 1&3                                        | RECORD 1.1: The type of data used should be specified in the title or abstract. When possible, the name of the databases used should be included.<br><br>RECORD 1.2: If applicable, the geographic region and timeframe within which the study took place should be reported in the title or abstract.<br><br>RECORD 1.3: If linkage between databases was conducted for the study, this should be clearly stated in the title or abstract. | Page 1&3<br><br>Page 3<br><br>Page 3            |
| <b>Introduction</b>       |          |                                                                                                                                                                                            |                                                 |                                                                                                                                                                                                                                                                                                                                                                                                                                             |                                                 |
| Background rationale      | 2        | Explain the scientific background and rationale for the investigation being reported                                                                                                       | Page 6&7                                        |                                                                                                                                                                                                                                                                                                                                                                                                                                             |                                                 |
| Objectives                | 3        | State specific objectives, including any prespecified hypotheses                                                                                                                           | Page 7&8                                        |                                                                                                                                                                                                                                                                                                                                                                                                                                             |                                                 |
| <b>Methods</b>            |          |                                                                                                                                                                                            |                                                 |                                                                                                                                                                                                                                                                                                                                                                                                                                             |                                                 |
| Study Design              | 4        | Present key elements of study design early in the paper                                                                                                                                    | Page 8                                          |                                                                                                                                                                                                                                                                                                                                                                                                                                             |                                                 |
| Setting                   | 5        | Describe the setting, locations, and relevant dates, including periods of recruitment, exposure, follow-up, and data collection                                                            | Page 8                                          |                                                                                                                                                                                                                                                                                                                                                                                                                                             |                                                 |
| Participants              | 6        | (a) <i>Cohort study</i> - Give the eligibility                                                                                                                                             | Page 8                                          | RECORD 6.1: The methods of study                                                                                                                                                                                                                                                                                                                                                                                                            | Page 8                                          |

|                                                                                                                                                                                                       |                              |                                                                                                                                                                                                                                                                                                                                                                                                                                                                                                                                                                                                                                                                               |                                                                                                                                                                                      |                                                                                                                                                                                                                                                                                                                                                                                                                                                                                                                                                                                                                                                                     |                                                                                                                                                                                                                        |         |
|-------------------------------------------------------------------------------------------------------------------------------------------------------------------------------------------------------|------------------------------|-------------------------------------------------------------------------------------------------------------------------------------------------------------------------------------------------------------------------------------------------------------------------------------------------------------------------------------------------------------------------------------------------------------------------------------------------------------------------------------------------------------------------------------------------------------------------------------------------------------------------------------------------------------------------------|--------------------------------------------------------------------------------------------------------------------------------------------------------------------------------------|---------------------------------------------------------------------------------------------------------------------------------------------------------------------------------------------------------------------------------------------------------------------------------------------------------------------------------------------------------------------------------------------------------------------------------------------------------------------------------------------------------------------------------------------------------------------------------------------------------------------------------------------------------------------|------------------------------------------------------------------------------------------------------------------------------------------------------------------------------------------------------------------------|---------|
| 1<br>2<br>3<br>4<br>5<br>6<br>7<br>8<br>9<br>10<br>11<br>12<br>13<br>14<br>15<br>16<br>17<br>18<br>19<br>20<br>21<br>22<br>23<br>24<br>25<br>26<br>27<br>28<br>29<br>30<br>31<br>32<br>33<br>34<br>35 |                              | <p>criteria, and the sources and methods of selection of participants. Describe methods of follow-up</p> <p><i>Case-control study</i> - Give the eligibility criteria, and the sources and methods of case ascertainment and control selection. Give the rationale for the choice of cases and controls</p> <p><i>Cross-sectional study</i> - Give the eligibility criteria, and the sources and methods of selection of participants</p> <p><i>(b) Cohort study</i> - For matched studies, give matching criteria and number of exposed and unexposed</p> <p><i>Case-control study</i> - For matched studies, give matching criteria and the number of controls per case</p> |                                                                                                                                                                                      | <p>population selection (such as codes or algorithms used to identify subjects) should be listed in detail. If this is not possible, an explanation should be provided.</p> <p>RECORD 6.2: Any validation studies of the codes or algorithms used to select the population should be referenced. If validation was conducted for this study and not published elsewhere, detailed methods and results should be provided.</p> <p>RECORD 6.3: If the study involved linkage of databases, consider use of a flow diagram or other graphical display to demonstrate the data linkage process, including the number of individuals with linked data at each stage.</p> | <p>Page 10</p> <p>N/A</p>                                                                                                                                                                                              |         |
| 36<br>37<br>38<br>39<br>40<br>41<br>42<br>43<br>44                                                                                                                                                    | Variables                    | 7                                                                                                                                                                                                                                                                                                                                                                                                                                                                                                                                                                                                                                                                             | Clearly define all outcomes, exposures, predictors, potential confounders, and effect modifiers. Give diagnostic criteria, if applicable.                                            | Page 9&10                                                                                                                                                                                                                                                                                                                                                                                                                                                                                                                                                                                                                                                           | <p>RECORD 7.1: A complete list of codes and algorithms used to classify exposures, outcomes, confounders, and effect modifiers should be provided. If these cannot be reported, an explanation should be provided.</p> | Page 10 |
| 45<br>46<br>47<br>48<br>49<br>50<br>51<br>52<br>53<br>54<br>55<br>56                                                                                                                                  | Data sources/<br>measurement | 8                                                                                                                                                                                                                                                                                                                                                                                                                                                                                                                                                                                                                                                                             | For each variable of interest, give sources of data and details of methods of assessment (measurement). Describe comparability of assessment methods if there is more than one group | Page 8                                                                                                                                                                                                                                                                                                                                                                                                                                                                                                                                                                                                                                                              |                                                                                                                                                                                                                        |         |

|                                                                                                                                                                                                    |                                  |    |                                                                                                                                                                                                                                                                                                                                                                                                                                                                                                                                                                      |                                                         |                                                                                                                                                       |        |
|----------------------------------------------------------------------------------------------------------------------------------------------------------------------------------------------------|----------------------------------|----|----------------------------------------------------------------------------------------------------------------------------------------------------------------------------------------------------------------------------------------------------------------------------------------------------------------------------------------------------------------------------------------------------------------------------------------------------------------------------------------------------------------------------------------------------------------------|---------------------------------------------------------|-------------------------------------------------------------------------------------------------------------------------------------------------------|--------|
| 1<br>2<br>3                                                                                                                                                                                        | Bias                             | 9  | Describe any efforts to address potential sources of bias                                                                                                                                                                                                                                                                                                                                                                                                                                                                                                            | Page 9                                                  |                                                                                                                                                       |        |
| 4<br>5<br>6<br>7<br>8                                                                                                                                                                              | Study size                       | 10 | Explain how the study size was arrived at                                                                                                                                                                                                                                                                                                                                                                                                                                                                                                                            | N/A – Entire provincial population of children included |                                                                                                                                                       |        |
| 9<br>10<br>11<br>12<br>13<br>14<br>15<br>16<br>17                                                                                                                                                  | Quantitative variables           | 11 | Explain how quantitative variables were handled in the analyses. If applicable, describe which groupings were chosen, and why                                                                                                                                                                                                                                                                                                                                                                                                                                        | Page 10&11                                              |                                                                                                                                                       |        |
| 18<br>19<br>20<br>21<br>22<br>23<br>24<br>25<br>26<br>27<br>28<br>29<br>30<br>31<br>32<br>33<br>34<br>35<br>36<br>37<br>38<br>39<br>40<br>41<br>42<br>43<br>44<br>45<br>46<br>47<br>48<br>49<br>50 | Statistical methods              | 12 | (a) Describe all statistical methods, including those used to control for confounding<br>(b) Describe any methods used to examine subgroups and interactions<br>(c) Explain how missing data were addressed<br>(d) <i>Cohort study</i> - If applicable, explain how loss to follow-up was addressed<br><i>Case-control study</i> - If applicable, explain how matching of cases and controls was addressed<br><i>Cross-sectional study</i> - If applicable, describe analytical methods taking account of sampling strategy<br>(e) Describe any sensitivity analyses | Page 11                                                 |                                                                                                                                                       |        |
| 51<br>52<br>53<br>54<br>55<br>56<br>57<br>58<br>59<br>60                                                                                                                                           | Data access and cleaning methods |    | ..                                                                                                                                                                                                                                                                                                                                                                                                                                                                                                                                                                   |                                                         | RECORD 12.1: Authors should describe the extent to which the investigators had access to the database population used to create the study population. | Page 2 |

|                  |    |                                                                                                                                                                                                                                                                                                                                                 |            |                                                                                                                                                                                                                                                                                                                    |         |
|------------------|----|-------------------------------------------------------------------------------------------------------------------------------------------------------------------------------------------------------------------------------------------------------------------------------------------------------------------------------------------------|------------|--------------------------------------------------------------------------------------------------------------------------------------------------------------------------------------------------------------------------------------------------------------------------------------------------------------------|---------|
|                  |    |                                                                                                                                                                                                                                                                                                                                                 |            | RECORD 12.2: Authors should provide information on the data cleaning methods used in the study.                                                                                                                                                                                                                    | Page 9  |
| Linkage          |    | ..                                                                                                                                                                                                                                                                                                                                              |            | RECORD 12.3: State whether the study included person-level, institutional-level, or other data linkage across two or more databases. The methods of linkage and methods of linkage quality evaluation should be provided.                                                                                          | Page 8  |
| <b>Results</b>   |    |                                                                                                                                                                                                                                                                                                                                                 |            |                                                                                                                                                                                                                                                                                                                    |         |
| Participants     | 13 | (a) Report the numbers of individuals at each stage of the study ( <i>e.g.</i> , numbers potentially eligible, examined for eligibility, confirmed eligible, included in the study, completing follow-up, and analysed)<br>(b) Give reasons for non-participation at each stage.<br>(c) Consider use of a flow diagram                          | Page 11    | RECORD 13.1: Describe in detail the selection of the persons included in the study ( <i>i.e.</i> , study population selection) including filtering based on data quality, data availability and linkage. The selection of included persons can be described in the text and/or by means of the study flow diagram. | Page 11 |
| Descriptive data | 14 | (a) Give characteristics of study participants ( <i>e.g.</i> , demographic, clinical, social) and information on exposures and potential confounders<br>(b) Indicate the number of participants with missing data for each variable of interest<br>(c) <i>Cohort study</i> - summarise follow-up time ( <i>e.g.</i> , average and total amount) | Page 11    |                                                                                                                                                                                                                                                                                                                    |         |
| Outcome data     | 15 | <i>Cohort study</i> - Report numbers of outcome                                                                                                                                                                                                                                                                                                 | Page 11&12 |                                                                                                                                                                                                                                                                                                                    |         |

|    |                   |                              |                                                                                                                                                                                                                                                                                                                                                                                                                 |                        |            |
|----|-------------------|------------------------------|-----------------------------------------------------------------------------------------------------------------------------------------------------------------------------------------------------------------------------------------------------------------------------------------------------------------------------------------------------------------------------------------------------------------|------------------------|------------|
| 1  |                   | events or summary            |                                                                                                                                                                                                                                                                                                                                                                                                                 |                        |            |
| 2  |                   | measures over time           |                                                                                                                                                                                                                                                                                                                                                                                                                 |                        |            |
| 3  |                   | <i>Case-control study</i> -  |                                                                                                                                                                                                                                                                                                                                                                                                                 |                        |            |
| 4  |                   | Report numbers in            |                                                                                                                                                                                                                                                                                                                                                                                                                 |                        |            |
| 5  |                   | each exposure                |                                                                                                                                                                                                                                                                                                                                                                                                                 |                        |            |
| 6  |                   | category, or summary         |                                                                                                                                                                                                                                                                                                                                                                                                                 |                        |            |
| 7  |                   | measures of exposure         |                                                                                                                                                                                                                                                                                                                                                                                                                 |                        |            |
| 8  |                   | <i>Cross-sectional study</i> |                                                                                                                                                                                                                                                                                                                                                                                                                 |                        |            |
| 9  |                   | - Report numbers of          |                                                                                                                                                                                                                                                                                                                                                                                                                 |                        |            |
| 10 |                   | outcome events or            |                                                                                                                                                                                                                                                                                                                                                                                                                 |                        |            |
| 11 |                   | summary measures             |                                                                                                                                                                                                                                                                                                                                                                                                                 |                        |            |
| 12 |                   |                              |                                                                                                                                                                                                                                                                                                                                                                                                                 |                        |            |
| 13 | Main results      | 16                           | (a) Give unadjusted estimates and, if applicable, confounder-adjusted estimates and their precision (e.g., 95% confidence interval). Make clear which confounders were adjusted for and why they were included<br>(b) Report category boundaries when continuous variables were categorized<br>(c) If relevant, consider translating estimates of relative risk into absolute risk for a meaningful time period | Page 11, 12 and tables |            |
| 14 |                   |                              |                                                                                                                                                                                                                                                                                                                                                                                                                 |                        |            |
| 15 |                   |                              |                                                                                                                                                                                                                                                                                                                                                                                                                 |                        |            |
| 16 |                   |                              |                                                                                                                                                                                                                                                                                                                                                                                                                 |                        |            |
| 17 |                   |                              |                                                                                                                                                                                                                                                                                                                                                                                                                 |                        |            |
| 18 |                   |                              |                                                                                                                                                                                                                                                                                                                                                                                                                 |                        |            |
| 19 |                   |                              |                                                                                                                                                                                                                                                                                                                                                                                                                 |                        |            |
| 20 |                   |                              |                                                                                                                                                                                                                                                                                                                                                                                                                 |                        |            |
| 21 |                   |                              |                                                                                                                                                                                                                                                                                                                                                                                                                 |                        |            |
| 22 |                   |                              |                                                                                                                                                                                                                                                                                                                                                                                                                 |                        |            |
| 23 |                   |                              |                                                                                                                                                                                                                                                                                                                                                                                                                 |                        |            |
| 24 |                   |                              |                                                                                                                                                                                                                                                                                                                                                                                                                 |                        |            |
| 25 |                   |                              |                                                                                                                                                                                                                                                                                                                                                                                                                 |                        |            |
| 26 |                   |                              |                                                                                                                                                                                                                                                                                                                                                                                                                 |                        |            |
| 27 |                   |                              |                                                                                                                                                                                                                                                                                                                                                                                                                 |                        |            |
| 28 |                   |                              |                                                                                                                                                                                                                                                                                                                                                                                                                 |                        |            |
| 29 |                   |                              |                                                                                                                                                                                                                                                                                                                                                                                                                 |                        |            |
| 30 |                   |                              |                                                                                                                                                                                                                                                                                                                                                                                                                 |                        |            |
| 31 |                   |                              |                                                                                                                                                                                                                                                                                                                                                                                                                 |                        |            |
| 32 |                   |                              |                                                                                                                                                                                                                                                                                                                                                                                                                 |                        |            |
| 33 |                   |                              |                                                                                                                                                                                                                                                                                                                                                                                                                 |                        |            |
| 34 |                   |                              |                                                                                                                                                                                                                                                                                                                                                                                                                 |                        |            |
| 35 |                   |                              |                                                                                                                                                                                                                                                                                                                                                                                                                 |                        |            |
| 36 |                   |                              |                                                                                                                                                                                                                                                                                                                                                                                                                 |                        |            |
| 37 | Other analyses    | 17                           | Report other analyses done—e.g., analyses of subgroups and interactions, and sensitivity analyses                                                                                                                                                                                                                                                                                                               | Page 12                |            |
| 38 |                   |                              |                                                                                                                                                                                                                                                                                                                                                                                                                 |                        |            |
| 39 |                   |                              |                                                                                                                                                                                                                                                                                                                                                                                                                 |                        |            |
| 40 |                   |                              |                                                                                                                                                                                                                                                                                                                                                                                                                 |                        |            |
| 41 |                   |                              |                                                                                                                                                                                                                                                                                                                                                                                                                 |                        |            |
| 42 |                   |                              |                                                                                                                                                                                                                                                                                                                                                                                                                 |                        |            |
| 43 | <b>Discussion</b> |                              |                                                                                                                                                                                                                                                                                                                                                                                                                 |                        |            |
| 44 | Key results       | 18                           | Summarise key results with reference to study objectives                                                                                                                                                                                                                                                                                                                                                        | Page 13                |            |
| 45 |                   |                              |                                                                                                                                                                                                                                                                                                                                                                                                                 |                        |            |
| 46 |                   |                              |                                                                                                                                                                                                                                                                                                                                                                                                                 |                        |            |
| 47 |                   |                              |                                                                                                                                                                                                                                                                                                                                                                                                                 |                        |            |
| 48 | Limitations       | 19                           | Discuss limitations of the study, taking into account sources of potential bias or imprecision. Discuss both direction and magnitude of any potential bias                                                                                                                                                                                                                                                      | Page 14&15             | Page 14&15 |
| 49 |                   |                              |                                                                                                                                                                                                                                                                                                                                                                                                                 |                        |            |
| 50 |                   |                              |                                                                                                                                                                                                                                                                                                                                                                                                                 |                        |            |
| 51 |                   |                              |                                                                                                                                                                                                                                                                                                                                                                                                                 |                        |            |
| 52 |                   |                              |                                                                                                                                                                                                                                                                                                                                                                                                                 |                        |            |
| 53 |                   |                              |                                                                                                                                                                                                                                                                                                                                                                                                                 |                        |            |
| 54 |                   |                              |                                                                                                                                                                                                                                                                                                                                                                                                                 |                        |            |
| 55 |                   |                              |                                                                                                                                                                                                                                                                                                                                                                                                                 |                        |            |
| 56 |                   |                              |                                                                                                                                                                                                                                                                                                                                                                                                                 |                        |            |
| 57 |                   |                              |                                                                                                                                                                                                                                                                                                                                                                                                                 |                        |            |
| 58 |                   |                              |                                                                                                                                                                                                                                                                                                                                                                                                                 |                        |            |
| 59 |                   |                              |                                                                                                                                                                                                                                                                                                                                                                                                                 |                        |            |
| 60 |                   |                              |                                                                                                                                                                                                                                                                                                                                                                                                                 |                        |            |

|                                                           |    |                                                                                                                                                                            |            |                                                                                                                                                          |        |
|-----------------------------------------------------------|----|----------------------------------------------------------------------------------------------------------------------------------------------------------------------------|------------|----------------------------------------------------------------------------------------------------------------------------------------------------------|--------|
|                                                           |    |                                                                                                                                                                            |            | eligibility over time, as they pertain to the study being reported.                                                                                      |        |
| Interpretation                                            | 20 | Give a cautious overall interpretation of results considering objectives, limitations, multiplicity of analyses, results from similar studies, and other relevant evidence | Page 13-16 |                                                                                                                                                          |        |
| Generalisability                                          | 21 | Discuss the generalisability (external validity) of the study results                                                                                                      | Page 13    |                                                                                                                                                          |        |
| <b>Other Information</b>                                  |    |                                                                                                                                                                            |            |                                                                                                                                                          |        |
| Funding                                                   | 22 | Give the source of funding and the role of the funders for the present study and, if applicable, for the original study on which the present article is based              | Page 1&2   |                                                                                                                                                          |        |
| Accessibility of protocol, raw data, and programming code |    | ..                                                                                                                                                                         |            | RECORD 22.1: Authors should provide information on how to access any supplemental information such as the study protocol, raw data, or programming code. | Page 1 |

\*Reference: Benchimol EI, Smeeth L, Guttman A, Harron K, Moher D, Petersen I, Sørensen HT, von Elm E, Langan SM, the RECORD Working Committee. The REporting of studies Conducted using Observational Routinely-collected health Data (RECORD) Statement. *PLoS Medicine* 2015; in press.

\*Checklist is protected under Creative Commons Attribution ([CC BY](https://creativecommons.org/licenses/by/4.0/)) license.

# BMJ Open

## Trends in mental health service utilization in immigrant youth in Ontario, Canada, 1996 to 2012: a population-based longitudinal cohort study.

|                                    |                                                                                                                                                                                                                                                                                                                                                                                                                                                              |
|------------------------------------|--------------------------------------------------------------------------------------------------------------------------------------------------------------------------------------------------------------------------------------------------------------------------------------------------------------------------------------------------------------------------------------------------------------------------------------------------------------|
| Journal:                           | <i>BMJ Open</i>                                                                                                                                                                                                                                                                                                                                                                                                                                              |
| Manuscript ID                      | bmjopen-2018-022647.R1                                                                                                                                                                                                                                                                                                                                                                                                                                       |
| Article Type:                      | Research                                                                                                                                                                                                                                                                                                                                                                                                                                                     |
| Date Submitted by the Author:      | 26-May-2018                                                                                                                                                                                                                                                                                                                                                                                                                                                  |
| Complete List of Authors:          | Saunders, Natasha; Hospital for Sick Children, Pediatrics<br>Lebenbaum, Michael; Institute for Clinical Evaluative Sciences<br>Lu, Hong; Institute for Clinical Evaluative Sciences,<br>Stukel, Therese; Institute for Clinical Evaluative Sciences,<br>Urquia, Marcelo; University of Manitoba; St. Michael's Hospital<br>Guttmann, Astrid; Institute for Clinical Evaluative Sciences, ; The Hospital<br>for Sick Children, Division of Pediatric Medicine |
| <b>Primary Subject<br>Heading</b>: | Health services research                                                                                                                                                                                                                                                                                                                                                                                                                                     |
| Secondary Subject Heading:         | Mental health, Paediatrics, Epidemiology                                                                                                                                                                                                                                                                                                                                                                                                                     |
| Keywords:                          | Organisation of health services < HEALTH SERVICES ADMINISTRATION &<br>MANAGEMENT, MENTAL HEALTH, PAEDIATRICS, PUBLIC HEALTH                                                                                                                                                                                                                                                                                                                                  |
|                                    |                                                                                                                                                                                                                                                                                                                                                                                                                                                              |

SCHOLARONE™  
Manuscripts

Only



1  
2  
3 1 Trends in mental health service utilization in immigrant youth in Ontario, Canada, 1996 to 2012: a  
4 2 population-based longitudinal cohort study.

5 3  
6 4 Natasha Ruth Saunders, pediatrician<sup>1,2,3,4</sup>, Michael Lebenbaum, epidemiologist<sup>3</sup>, Hong Lu,  
7 5 biostatistician<sup>3</sup>, Therese A. Stukel, professor<sup>3,5</sup>, Marcelo Luis Urquia, professor<sup>3,5,6</sup>, and Astrid  
8 6 Guttman, pediatrician<sup>1,2,3,4,5</sup>

9 7  
10 8 **Affiliations:** <sup>1</sup>The Hospital for Sick Children, Toronto, Canada, <sup>2</sup>Department of Pediatrics,  
11 9 University of Toronto, Toronto, Canada; <sup>3</sup>Institute for Clinical Evaluative Sciences, Toronto,  
12 10 Canada; <sup>4</sup>Child Health Evaluative Sciences, Sickkids Research Institute, Toronto, Canada <sup>5</sup>Institute  
13 11 of Health Policy, Management and Evaluation, Dalla Lana School of Public Health, The University  
14 12 of Toronto, Toronto, Canada; <sup>6</sup>Centre for Research on Inner City Health, Li Ka Shing Knowledge  
15 13 Institute, St. Michael's Hospital, Toronto, ON, Canada.

16 14  
17 15 **Address correspondence to:** Natasha Saunders, natasha.saunders@sickkids.ca  
18 16 The Hospital for Sick Children 555 University Avenue, Toronto, Ontario M5G 1X8  
19 17 416-813-7654 x203076 (p), 416-813-5663 (f)

20 18  
21 19 **Short title:** Immigrant mental health trends over time.

22 20  
23 21 **Key words:** pediatrics, immigration, refugee, mental health, access

24 22  
25 23 **Funding Source:** This study was supported by the Institute for Clinical Evaluative Sciences  
26 24 (ICES), which is funded by an annual grant from the Ontario Ministry of Health and Long-Term  
27 25 Care (MOHLTC). The opinions, results, and conclusions reported in this paper are those of the  
28 26 authors and are independent from the funding sources. No endorsement by ICES or the Ontario  
29 27 MOHLTC is intended or should be inferred. Parts of this material are based on data and information  
30 28 compiled and provided by the Canadian Institute for Health Information (CIHI) and Immigration,  
31 29 Refugees and Citizenship Canada (IRCC). However, the analyses, conclusions, opinions and  
32 30 statements expressed herein are those of the authors, and not necessarily those of CIHI and IRCC.  
33 31 Astrid Guttman is funded through an Applied Chair in Child Health Services and Policy Research  
34 32 from the Canadian Institutes for Health Research (CIHR). Marcelo L. Urquia holds a CIHR New  
35 33 Investigator Award. Data cutting for this project and analysis was supported by the Ontario  
36 34 Ministry of Health and Long-Term Care.

37 35 **Financial Disclosure:** All authors have no financial relationships relevant to this article to disclose.

38 36  
39 37 **Conflict of Interest:** All authors have no conflicts of interest to disclose.

40 38  
41 39 **Transparency declaration:** N. Saunders affirms that the manuscript is an honest, accurate, and  
42 40 transparent account of the study being reported and no important aspects of the study have been  
43 41 omitted. Any discrepancies from the study as planned have been explained.

44 42  
45 43 **Data Sharing:** The authors confirm that all data underlying the findings are fully available without  
46 44 restriction. Data are available from the Institute for Clinical Evaluative Sciences (ICES)  
47 45 Institutional Data Access for researchers who meet the criteria for access to confidential data.

1  
2  
3 46 Contact natasha.saunders@sickkids.ca for data access. Individual patient consent was not obtained  
4 47 but the presented data are anonymized and risk of identification is low.  
5 48

6 49 **Contributors' Statement:** N. Saunders conceptualized and designed the study, interpreted the  
7 50 results, drafted the initial manuscript, revised the manuscript, and approved the final manuscript as  
8 51 submitted. M. Lebenbaum, T. Stukel, M. Urquia, and A. Guttmann conceptualized and designed the  
9 52 study, interpreted the results, revised the manuscript, and approved the final manuscript as  
10 53 submitted. H. Lu conceptualized and designed the study, had access to and analysed the data,  
11 54 interpreted the results, revised the manuscript, and approved the final manuscript as submitted. All  
12 55 authors approved the final manuscript as submitted and agree to be accountable for all aspects of  
13 56 the work.  
14 57  
15 58  
16  
17  
18  
19 59  
20  
21  
22 60  
23  
24  
25 61  
26  
27  
28 62  
29  
30  
31 63  
32  
33  
34 64  
35  
36  
37  
38  
39  
40  
41  
42  
43  
44  
45  
46  
47  
48  
49  
50  
51  
52  
53  
54  
55  
56  
57  
58  
59  
60

1  
2  
3 65 **Abstract**

4  
5 66 **Objective:** To describe trends in mental health service use of youth by immigration status and  
6  
7 67 characteristics.

8  
9 68 **Design:** Population-based longitudinal cohort study from 1996 to 2012 using linked health and  
10  
11 69 administrative datasets.

12  
13  
14 70 **Setting:** Ontario, Canada.

15  
16 71 **Participants:** Youth 10 to 24 years, living in Ontario, Canada

17  
18 72 **Exposure.** The main exposure was immigration status (recent immigrants vs. long-term residents).  
19  
20  
21 73 Secondary exposures were region of origin and refugee status.

22  
23 74 **Main Outcome Measure:** Mental health hospitalizations, emergency department visits, and  
24  
25 75 outpatient visits within consecutive 3-year time periods. Poisson regression models estimated rate  
26  
27 76 ratios (RR).

28  
29  
30 77 **Results:** Over 2.5 million person years per period were included. Rates of recent immigrant mental  
31  
32 78 health service utilization were at least 40% lower than long-term residents ( $p<0.0001$ ). Mental  
33  
34 79 health hospitalization and emergency department visit rates increased in long-term residents  
35  
36 80 (hospitalizations, RR 1.09 (95% confidence intervals 1.08-1.09); emergency department visits, RR  
37  
38 81 1.15 (1.14-1.15)) and recent immigrants (hospitalizations RR 1.05 (1.03-1.07); emergency  
39  
40 82 department visits, RR 1.08 (1.05-1.11)). Mental health outpatient visit rates increased in long-term  
41  
42 83 residents (RR 1.03 (1.03-1.03)) but declined in recent immigrant (RR 0.94 (0.93-0.95)).

43  
44 84 Comparable divergent trends in acute care and outpatient service use were observed among  
45  
46 85 refugees and across most regions of origin. Recent immigrant acute care use was driven by longer-  
47  
48 86 term refugees (hospitalizations RR 1.12; (1.03-1.21); emergency department visits RR 1.11 (1.02-  
49  
50 87 1.20)).  
51  
52  
53  
54  
55  
56  
57  
58  
59  
60

1  
2  
3 88 **Conclusions:** Mental health service utilization was lower among recent immigrants than long-term  
4  
5 89 residents. While acute care use is increasing at a faster rate among long-term residents than recent  
6  
7 90 immigrants, the decrease in outpatient mental health visits in immigrants highlights a potential  
8  
9 91 emerging disparity in access to preventative care.  
10

11  
12 92 **Trial Registration:** Not Applicable.  
13  
14 93  
15  
16 94  
17  
18 95  
19  
20  
21  
22  
23  
24  
25  
26  
27  
28  
29  
30  
31  
32  
33  
34  
35  
36  
37  
38  
39  
40  
41  
42  
43  
44  
45  
46  
47  
48  
49  
50  
51  
52  
53  
54  
55  
56  
57  
58  
59  
60

1  
2  
3 96 **Strengths and Limitations of this Study:**  
4

- 5 97 • This is first population-based study to evaluate trends over time in mental health service use  
6  
7 98 in immigrant youth in Canada and the largest such study globally.  
8  
9 99 • Using individual linked health and demographic databases, we were able to obtain health  
10  
11 services use for a broad range of mental health disorders in a large population of youth.  
12 100  
13  
14 101 • The immigration database allowed a detailed level of information about immigration  
15  
16 102 characteristics and is also distinguished from other mental health studies among immigrants  
17  
18 103 which are often survey based, self-reported (and therefore under-reported) and have smaller  
19  
20 104 sample sizes.  
21  
22  
23 105 • Limitations include absence of information on mental health need, social support and  
24  
25 106 informal use of mental health services (e.g. religious leaders, social workers, community  
26  
27 107 support networks).  
28  
29  
30 108 • Data on psychologist, social work, and community mental health agency use are not  
31  
32 109 currently available for linking.  
33  
34  
35 110

## 111 **Introduction**

112 Mental health problems among youth contribute to significant morbidity and mortality across the  
113 globe, affecting one in five individuals.(1, 2) Recent population-based data suggests the burden of  
114 mental health problems among youth in Ontario, Canada is rising,(1) as is mental health service use  
115 in North America.(3, 4) Understanding trends over time in the utilization of mental health services  
116 is critical for optimal health service delivery. Accordingly, to make appropriately targeted health  
117 system improvements, identifying mental health trends in at-risk populations, including the growing  
118 population of immigrant youth, is important. This is increasingly becoming essential on an  
119 international scale given global migration and the current refugee crisis. Immigrants may face  
120 challenges integrating pre-migration social, cultural, and political experiences and post-migration  
121 resettlement stressors with their new lives as permanent residents or naturalized citizens. These  
122 experiences influence the complex set of factors that shape an immigrant's ability to access health  
123 services and their risk for mental health and addiction problems before, upon, and after arrival.(5-7)  
124 In Canada, approximately 20% of the population are 'landed immigrants' or 'permanent residents'  
125 (granted permission to live and work in Canada without limitations on one's stay). Of these, 85 to  
126 90% are skilled and educated workers, arriving as non-refugees.(8) Over the past two decades,  
127 shifts in immigration patterns to Canada have occurred. In particular, in recent years, there has  
128 been a relative increase in migration of South and East Asian populations with a simultaneous  
129 decline in immigrants from Eastern Europe and Central Asia.(8) These shifts are, in part, reflective  
130 of changes to Canadian immigration policy over time(9, 10) and indicative of changing drivers of  
131 global migration including political instability, economic opportunity, and family reunification.  
132 Changes to pre- and post-immigration exposures that may influence mental health service need,  
133 utilization, and access may accompany these variations in migration.

1  
2  
3 134 Existing literature on the epidemiology of mental health problems in immigrant youth is  
4  
5 135 inconsistent and typically based on smaller sub-sets of immigrants, most of which, rely on self-  
6  
7 136 report.(5, 6, 11-13) Social deprivation, common among immigrants, is often cited as a risk factor  
8  
9 137 for mental health problems(14, 15) but protective immigration factors may counter this risk.(16)  
10  
11  
12 138 One Danish population-based, administrative database study(17) showed higher rates of mental  
13  
14 139 health problems in immigrants compared with non-immigrants. This is in contrast to other  
15  
16 140 population-based North American and other European studies in both adolescents and adults where  
17  
18 141 there is a more pronounced 'healthy immigrant effect' – that is, individuals arrive in better health,  
19  
20 142 with lower rates of mental health problems, than their native-born counterparts.(7, 18, 19) This  
21  
22 143 may be due to differences in immigration policies in receiving countries that select for healthier,  
23  
24 144 more able-bodied individuals. Literature on the mental health of immigrant youth in Canada is  
25  
26 145 limited to a few small survey studies that suggest lower rates of mental health problems among  
27  
28 146 immigrants.(20, 21)  
29  
30  
31  
32 147 Despite the substantial proportion of health services concentrated on mental health care and  
33  
34 148 Canada's large and evolving immigrant population, little is known about the how mental health  
35  
36 149 service use has changed over time in immigrants. In this study, we aimed to describe the time trends  
37  
38 150 in mental health service utilization in recent immigrant youth in Ontario compared with long-term  
39  
40 151 residents. We also sought to describe these time trends among sub-groups of immigrants, including  
41  
42 152 by immigrant class, duration of residency in Canada, and region of origin. We hypothesized that  
43  
44 153 overall, immigrants would have lower utilization of the health care system for mental health  
45  
46 154 compared with long-term residents. However, we expected increasing rates of use in both recent  
47  
48 155 and long-term residents given widespread efforts in more recent years to reduce mental health  
49  
50 156 stigma and improve help-seeking behaviours.(22) We hypothesize that refugees, in particular,  
51  
52  
53  
54  
55  
56  
57  
58  
59  
60

1  
2  
3 157 would have an increasing trend in mental health use given the changes over time in Canada's  
4  
5 158 immigration policies that have shifted refugee selection to more at-risk populations.(9, 10)  
6

## 7 159 **Methods**

### 8 9 160 *Study Design*

10  
11  
12 161 This was a population-based longitudinal study using data available through a research agreement  
13  
14 162 between the Ontario Ministry of Health and Long-Term Care and the Institute for Clinical  
15  
16 163 Evaluative Sciences (ICES). The study was approved by the Research Ethics Board at Sunnybrook  
17  
18 164 Health Sciences Centre in Toronto, Ontario.

### 19 165 *Patient Involvement*

20  
21  
22 166 Patients were not directly involved in this study.

### 23 167 *Data Collection*

24  
25  
26 168 Youth were identified using a unique, encoded, health identification number that linked several  
27  
28 169 health and administrative databases available at ICES to obtain study data. Immigrant status was  
29  
30 170 ascertained through the Ontario portion of the Immigration, Refugees and Citizenship Canada  
31  
32 171 (IRCC) Permanent Resident Database. The IRCC database contains individual level demographic  
33  
34 172 information from Ontario's permanent residents from 1985 to 2012.(9, 18) A number of  
35  
36 173 immigration characteristics were used from the database including immigrant visa class (refugee  
37  
38 174 versus non-refugee), duration of residence in Canada (based on the earlier of year of obtaining  
39  
40 175 permanent residency in Canada or the year of Ontario Health Insurance Plan (OHIP) eligibility),  
41  
42 176 and World Bank region of origin (based on the country of birth). The Registered Persons Database,  
43  
44 177 Ontario's universal health insurance registry, was used to obtain age and sex for every OHIP  
45  
46 178 eligible individual meeting study criteria. Emergency department (ED) visits were obtained  
47  
48 179 through the National Ambulatory Care Reporting System (NACRS) (2002-2012) and hospital  
49  
50 180 admissions were identified from the Canadian Institute for Health Information Discharge Abstract  
51  
52  
53  
54  
55  
56  
57  
58  
59



1  
2  
3 181 Database (CIHI-DAD) (1996-2012) and from the Ontario Mental Health Reporting System  
4  
5 182 (OMHRS) (2005-2012). To determine outpatient service use to physicians, mental health visits to  
6  
7 183 primary care physicians and psychiatrist outpatient visits were determined from the OHIP billings  
8  
9 184 database (1996-2012). In Ontario, residents are eligible for most hospital and physician services  
10  
11 185 through OHIP which acts as a single payer for the province. Immigrants with permanent resident  
12  
13 186 status are eligible if they have resided in Ontario for three months. Refugees with permanent  
14  
15 187 resident status may obtain OHIP coverage upon arrival.(23) Data from asylum-seekers (those  
16  
17 188 arriving in Canada and subsequently seeking refugee status) are not captured in the available  
18  
19 189 databases. Statistics Canada's Postal Code Conversion File was used to link patients' postal code at  
20  
21 190 the time of the visit to derive area level neighborhood income quintile and community size from the  
22  
23 191 1996, 2001, and 2006 Canadian Censuses.

### 28 192 *Study population*

29  
30 193 All youth ages 10 to 24 years who were eligible for OHIP during the study period from 1996 to  
31  
32 194 2012 were included. Cohorts were grouped into 3-year periods, except for the final two study  
33  
34 195 years, which were grouped as a 2-year period. Youth entered the study upon their 10<sup>th</sup> birthday and  
35  
36 196 exited on their 25<sup>th</sup> birthday. Those with an invalid encoded health number or missing sex were  
37  
38 197 excluded from the study. Non-Ontario residents at the onset of the study cohort period were also  
39  
40 198 excluded. Finally, individuals without an IRCC record (Canadian born or immigrants who moved  
41  
42 199 to Ontario from another province) who first became eligible for OHIP within 5 years of each cohort  
43  
44 200 period were excluded to reduce the possibility of unlinked IRCC records inappropriately being  
45  
46 201 included as Canadian born.

### 51 202 *Exposure variables*

52  
53 203 The main exposure was immigrant status, categorized as recent immigrant or long-term resident.  
54  
55 204 Recent immigrants were defined based on having an IRCC Permanent Resident Database record  
56  
57  
58  
59

1  
2  
3 205 and a duration of residence in Ontario < 10 years. Long-term residents included all Canadian born  
4  
5 206 Ontario residents and individuals with an IRCC Permanent Resident Database record who had  
6  
7 207 landed in Canada  $\geq 10$  years from the start of the cohort period. Immigrant status was determined at  
8  
9 208 the beginning of each period. Thus, recent immigrants in one period could become long-term  
10  
11 209 residents in a subsequent period, so long as they maintained OHIP eligibility and study age criteria.  
12  
13

#### 14 210 *Covariates*

15  
16 211 A number of covariates were considered in the analysis. These included age, sex, neighborhood  
17  
18 212 income quintile within a dissemination area, and community size. Within recent immigrants,  
19  
20 213 covariates also included refugee status, duration of residency in Ontario (< 5 years and  $\geq 5$  to 10  
21  
22 214 years), region of origin based on modified World Bank Regions,(24) and the interaction between  
23  
24 215 duration of residency and refugee status, and between time with refugee status, duration of  
25  
26 216 residency, and region of birth.  
27  
28  
29

#### 30 217 *Outcome measures*

31  
32 218 The main outcome measure was mental health service utilization, within each time period.  
33  
34 219 Utilization was measured as all outpatient physician visits, ED visits and hospitalizations for a  
35  
36 220 mental health related problem. Outpatient physician mental health visits were identified using  
37  
38 221 OHIP billing codes and included visits to psychiatrists and visits to family physicians or  
39  
40 222 pediatricians where billing codes for mental health services or visits with a mental health diagnostic  
41  
42 223 code were used. This definition was based on a validated algorithm for ambulatory mental health  
43  
44 224 care modified by adding specific pediatric diagnostic codes.(25) These billings do not include  
45  
46 225 services provided by psychologists, social workers, and community-based non-physician mental  
47  
48 226 health services. ED visits were identified within NACRS where the main ED diagnosis was a  
49  
50 227 mental health disorder (F04-F99) or a secondary diagnosis was for self-inflicted injury (intentional  
51  
52 228 self-harm, X60-X84), both based on International Classification of Disease 9<sup>th</sup> and 10<sup>th</sup> edition  
53  
54  
55  
56  
57  
58  
59  
60

1  
2  
3 229 codes. Similarly, hospitalizations were identified as any hospitalization with a mental health  
4  
5 230 diagnostic code (F04-F99) captured in CIHI-DAD or any hospitalization to a provincially  
6  
7 231 designated mental health hospital bed identified within OMHRS, except for admissions for  
8  
9 232 dementia. See Appendix A for codes used to identify mental health visits.

### 11 233 *Analysis*

13  
14 234 The total number of individuals, person years of exposure, and number and rate of events for each  
15  
16 235 cohort period were estimated. An unadjusted time trend for each outcome by immigrant status was  
17  
18 236 estimated. The interaction between immigrant status and time was tested and where significant,  
19  
20 237 separate slopes for each exposure group were presented. A subgroup analysis on recent immigrants  
21  
22 238 was then performed to estimate an adjusted time trend for recent immigrant subgroups by region of  
23  
24 239 origin, refugee status, and duration of residence. The unit of analysis was the individual resident.  
25  
26 240 Multivariable models were built for each outcome, adjusting for age, sex, income quintile, and  
27  
28 241 community size. All analyses were estimated using Poisson regression with Generalized Estimating  
29  
30 242 Equations using an independent correlation structure for outpatient and ED visits and autoregressive  
31  
32 243 correlation structure for hospitalizations. Results are presented as rate ratios (RR). Analyses were  
33  
34 244 conducted with SAS Enterprise Guide, version 6.1 (SAS Institute Inc., Cary, NC).

### 35 245 **Results**

36  
37 246 Approximately 2.5 to 2.9 million individuals contributed to each time period. Supplementary Figure  
38  
39 247 1 shows a flow chart of a sample of a cohort period with exclusions applied. Recent immigrants  
40  
41 248 made up 9.8 to 11.5% of the cohort in each cohort period and refugees represented 17.7 to 18.0% of  
42  
43 249 recent immigrants. The regions of origin changed over time, initially with Europe and Central Asia  
44  
45 250 as the leading regions, and more recently South and East Asia (Table I).

46  
47 251 Figure 1 shows the unadjusted time trends in rates of mental health service utilization in recent  
48  
49 252 immigrants and long-term residents. Mental health service utilization was much lower for  
50  
51  
52

1  
2  
3 253 outpatient physician and acute care services in recent immigrants compared with long-term  
4  
5 254 residents (all rate ratios  $\leq 0.60$ ,  $p < 0.001$ ) (Table II). Both ED visits and hospitalizations rates  
6  
7 255 increased over time in recent immigrants and long-term residents but the increase in rates was  
8  
9 256 higher in long-term residents (Table II). Rates of outpatient physician visits for mental health  
10  
11 257 increased over time in long-term residents but decreased over time in recent immigrants (Table II).  
12  
13  
14 258 Low income and female sex were associated with an increased rate of mental health service use.  
15  
16 259 Late childhood and early adolescence was associated with a lower rate of mental health service use.  
17  
18 260 Urban individuals had the lowest rate of being admitted to hospital and the highest rate of using  
19  
20 261 outpatient physician mental health services.  
21  
22  
23 262 Within subgroups of immigrants, refugees had higher rates of ED visits and hospitalizations  
24  
25 263 compared with non-refugee recent immigrants and the recent increase in ED service use was driven  
26  
27 264 by refugees (Figure 2, Table III). The increase in hospitalization rates for mental health was  
28  
29 265 influenced primarily by refugees with a duration of residence of 5 to 10 years in Canada (Table III).  
30  
31 266 Trends in outpatient physician visit rates among recent immigrants were similar by refugee status  
32  
33 267 and duration of residence in Canada (Figure 2, Table III).  
34  
35 268 The unadjusted rates of mental health outpatient and ED visits and hospitalizations by region of  
36  
37 269 origin are shown in Figure 3 with adjusted rates in Table III. Across all regions, except Europe,  
38  
39 270 Central Asia, and North America, there were convergent trends in outpatient and acute care service  
40  
41 271 use for mental health conditions, with outpatient service use declining and acute care service use  
42  
43 272 increasing over time.  
44  
45  
46  
47  
48

## 49 273 **Discussion**

50  
51 274 This large population-based longitudinal study examined mental health service use over time in  
52  
53 275 recent immigrants and long-term residents in Ontario. Patterns of mental health service use over  
54  
55 276 time were consistently lower for outpatient physician and acute care mental health services by  
56  
57  
58  
59  
60

1  
2  
3 277 recent immigrants compared with long-term residents. Rates of acute care mental health service use  
4  
5 278 increased over time in both groups but at a faster rate in long-term residents. Strikingly, outpatient  
6  
7 279 physician mental health service use increased over time in long-term residents but decreased in  
8  
9 280 recent immigrant groups. These discordant trends in outpatient and acute care mental health service  
10  
11 281 use were observed across both refugees and non-refugee immigrants and in immigrants from most  
12  
13  
14 282 world regions.

15  
16 283 Lower rates of mental health services use by immigrants have also been observed in other large  
17  
18 284 population-based cross-sectional studies of Canadian adults(18, 26) and in smaller cohort studies  
19  
20 285 across the globe (27), though not consistently(17, 28) For example, adolescents living in Sweden  
21  
22 286 with foreign-born parents were less likely than adolescents with Swedish parents to use both  
23  
24  
25 287 outpatient and inpatient psychiatric services. This was particularly true for those whose families  
26  
27 288 originated in low or middle income countries.(19) Refugees in Denmark have lower rates of  
28  
29 289 psychiatric service contacts compared with their native born peers.(29) The variability in reported  
30  
31 290 differences between mental health burden in immigrant and native populations may be due to  
32  
33 291 differences in immigration policies in receiving countries. Some have attributed better mental  
34  
35 292 health in immigrant populations to selective migration for healthier individuals.(30, 31) This  
36  
37 293 'healthy immigrant effect' has been observed for a number of adult conditions(32) but for few  
38  
39 294 pediatric diseases(33, 34) and, to our knowledge, has not been demonstrated in Canadian refugee  
40  
41  
42 295 youth. Lower rates of mental health service use may be due to different care-seeking behaviours,  
43  
44 296 with poor self-identification of mental health problems or more internalizing problems in immigrant  
45  
46  
47 297 populations.(20, 27)

48  
49  
50  
51 298 In both recent immigrants and long-term residents, we found increases in ED visits and  
52  
53 299 hospitalizations over time. Similar trends among youth have been reported in the United States(3)  
54  
55 300 and Australia.(35) This may be a reflection of greater awareness and acceptance of mental health

1  
2  
3 301 problems in recent years from reduced stigma,(22) or formal strategies to improve access to mental  
4  
5 302 health services in the last several years in Ontario.(36, 37) The differential rates of increase in acute  
6  
7 303 care service use in these populations may be that strategies to improve mental health services and  
8  
9 304 reduce mental health stigma are not reaching all populations, in particular recent immigrant youth.  
10  
11 305 The increasing rate over time in acute care service use by refugees highlights the importance of the  
12  
13 306 vulnerability of this population and the need for active surveillance of individuals, especially with  
14  
15 307 the current global refugee crisis and changes to immigration policies that select for a larger number  
16  
17 308 of more vulnerable refugees.(9)  
18  
19 309 The divergent trends in outpatient physician service use over time between study groups signals  
20  
21 310 emerging differences in health service delivery for recent immigrants. This may be a reflection of  
22  
23 311 different access to or availability of outpatient physician care or increasing stigma of mild mental  
24  
25 312 health problems among immigrants with consequent internalization of mental health problems.  
26  
27 313 Moreover, there may be a lack of familiarity with mental health services in certain immigrant  
28  
29 314 populations. For example, while Swedish immigrant youth have lower rates of mental health  
30  
31 315 utilization compared with non-immigrants,(19) their rates of self-reported, parent-reported and  
32  
33 316 teacher-reported mental health problems are similar to non-immigrants(28), suggesting a potential  
34  
35 317 unmet need in service delivery. Similarly, despite high rates of mental distress, refugee children in  
36  
37 318 Denmark use fewer psychiatric services and therefore may experience barriers to access and care  
38  
39 319 for mental health.(29) Conversely, these finding may signify immigrants are increasingly receiving  
40  
41 320 alternative, non-physician mental health services though school-based programs, community mental  
42  
43 321 health service agencies, or psychologists. The observed regional differences in outpatient trends,  
44  
45 322 with 'Western' regions having more similar trends to long-term Canadian residents, suggests  
46  
47 323 cultural congruency may be contributing to the observed findings. Equally, the observed  
48  
49 324 differences may be explained by a heavier reliance on informal supports from strong familial and  
50  
51  
52  
53  
54  
55  
56  
57  
58  
59

1  
2  
3 325 social networks in immigrant populations.(38) This latter notion could enhance strategies to  
4  
5 326 improve the mental health of high use populations, including those who are native-born.

6  
7 327 *Strengths and Limitations*

8  
9 328 To our knowledge, this is the first study to evaluate trends over time in mental health service use in  
10  
11 329 immigrant youth in Canada and the largest such study globally. Using individual linked health and  
12  
13 330 demographic databases, we were able to obtain health services use for a broad range of mental  
14  
15 331 health disorders in a large population of youth. We had almost complete provincial data with  
16  
17 332 virtually no loss of individual records. The immigration database allowed a detailed level of  
18  
19 333 information about immigration characteristics. This study is also distinguished from other mental  
20  
21 334 health studies among immigrants which are often survey based, self-reported (and therefore under-  
22  
23 335 reported), have smaller sample sizes, and are largely focused on adults.

24  
25  
26 336 Limitations to this study include absence of information on mental health need, social support and  
27  
28 337 informal use of mental health services (e.g. religious leaders, social workers, community support  
29  
30 338 networks). Data on psychologist, social work, and community mental health agency use are not  
31  
32 339 currently available for linking. These data would help contextualize our findings and allow us to  
33  
34 340 understand whether observed divergent trends are related to difficulty accessing physician care or  
35  
36 341 rather, determine if there are differential treatment-seeking behaviours by recent immigrants. Our  
37  
38 342 definition of mental health hospitalization did not include the small number of hospitalizations for  
39  
40 343 self-injury where there may have been co-existing mental illness but the injury itself was the  
41  
42 344 diagnosis most responsible for the length of stay. Our study did not include measures of clinical  
43  
44 345 comorbidities which may affect mental health service use. We did not have available primary care  
45  
46 346 data from community health centres which traditionally serve a higher proportion of immigrants  
47  
48 347 and marginalized populations.(39) However, community health centres in Ontario serve less than  
49  
50 348 1% of the population, of which 16% are newcomers.(39) In this study, we were not able to track  
51  
52  
53  
54  
55  
56  
57  
58  
59

1  
2  
3 349 immigrants who entered Ontario from a different province, refugee claimants awaiting a decision  
4  
5 350 on residency, temporary residents, or 'non-status' residents. Finally, differential self-perceived  
6  
7 351 mental health status and cultural incongruence may lead to mis-diagnosis and therefore under-  
8  
9 352 reporting of mental health problems, by health care providers.

## 11 353 **Conclusions**

12  
13  
14 354 This large population-based longitudinal study of youth showed mental health acute care services  
15  
16 355 are increasing over time in recent immigrant and long-term resident populations. However, there is  
17  
18 356 an increasing difference in outpatient mental health service use with mental health outpatient  
19  
20 357 physician visits decreasing in recent immigrant populations, despite an increased acute care service  
21  
22 358 use over time. Future studies are needed to understand why these service differences exists to  
23  
24 359 ensure recent immigrants in need of mental health services are identified and able to access needed  
25  
26 360 care. Understanding whether divergent trends reflect difficulty accessing physician mental health  
27  
28 361 care or whether alternative models of mental health service delivery are serving these populations is  
29  
30 362 important. Development of strategies to reduce potential inequities in access and use with an active  
31  
32 363 effort to clarify the role of mental health services for recent immigrants are essential to ensuring  
33  
34 364 equity in the provision of mental health service for all youth.  
35  
36  
37  
38  
39  
40  
41  
42  
43  
44  
45  
46  
47  
48  
49  
50  
51  
52  
53  
54  
55  
56  
57  
58  
59  
60



**Table I.** OHIP eligible youth by period in Ontario

|                                    | 1996 to 1998 | 1999 to 2001 | 2002 to 2004 | 2005 to 2007 | 2008 to 2010 | 2011 to 2012 |
|------------------------------------|--------------|--------------|--------------|--------------|--------------|--------------|
| <b>Overall, N</b>                  | 2521439      | 2692524      | 2824820      | 2929879      | 2887553      | 2714188      |
| <b>Immigrant Status, %</b>         |              |              |              |              |              |              |
| Long-term residents                | 88.7         | 88.7         | 88.6         | 88.5         | 88.7         | 90.2         |
| Recent immigrants                  | 11.3         | 11.3         | 11.4         | 11.5         | 11.3         | 9.8          |
| <b>Age at Index (Years), %</b>     |              |              |              |              |              |              |
| 10-14                              | 45.6         | 46.1         | 45.7         | 44.5         | 43.4         | 38.9         |
| 15-19                              | 27.0         | 27.4         | 27.9         | 28.3         | 28.8         | 30.9         |
| 20-24                              | 27.4         | 26.4         | 26.3         | 27.2         | 27.9         | 30.2         |
| <b>Sex</b>                         |              |              |              |              |              |              |
| Female                             | 49.1         | 49.0         | 49.0         | 49           | 48.9         | 48.8         |
| Male                               | 50.9         | 51.0         | 51.0         | 51           | 51.5         | 51.2         |
| <b>Income Quintile, %</b>          |              |              |              |              |              |              |
| Income missing                     | 0.3          | 0.5          | 0.4          | 0.4          | 0.4          | 0.4          |
| Income quintile 1 (lowest)         | 20.0         | 20.5         | 20.0         | 21.0         | 20.0         | 19.4         |
| Income quintile 2                  | 19.3         | 19.9         | 19.6         | 19.7         | 19.3         | 18.9         |
| Income quintile 3                  | 19.8         | 19.8         | 19.8         | 19.4         | 19.7         | 19.8         |
| Income quintile 4                  | 20.3         | 19.4         | 20.0         | 19.5         | 20.4         | 20.9         |
| Income quintile 5                  | 20.3         | 20.0         | 20.1         | 20.0         | 20.3         | 20.5         |
| <b>Community Size, %</b>           |              |              |              |              |              |              |
| 1 500 000+                         | 45.9         | 40.5         | 41.6         | 42.5         | 43.3         | 43.7         |
| 500 000 – 1 499 999                | 5.6          | 12.1         | 12.1         | 12.1         | 12.2         | 12.3         |
| 100 000 – 499 999                  | 23.9         | 24.0         | 24.0         | 25.1         | 25.1         | 25.2         |
| 10 000 – 99 999                    | 9.1          | 9.6          | 9.2          | 8.2          | 7.8          | 7.6          |
| < 10 000                           | 15.6         | 13.8         | 13.2         | 12           | 11.5         | 11.2         |
| <b>Immigration characteristics</b> |              |              |              |              |              |              |
| <b>N</b>                           | 284150       | 304991       | 322173       | 337163       | 326556       | 265061       |
| <b>Refugee Status, %</b>           |              |              |              |              |              |              |
| Non-refugee, 0-5 years             | 58.5         | 54.7         | 53.7         | 55.4         | 49.4         | 41.5         |
| Non-refugee, ≥5-10 years           | 23.8         | 27.5         | 28.4         | 26.9         | 32.6         | 39.9         |
| Refugees, 0-5 years                | 12.4         | 11.1         | 12.5         | 12.7         | 12.5         | 11.2         |
| Refugees, ≥5-10 years              | 5.3          | 6.6          | 5.4          | 5.0          | 5.5          | 7.5          |
| <b>Region of Birth, %</b>          |              |              |              |              |              |              |
| East Asia & Pacific                | 22.1         | 21.4         | 21.6         | 22.9         | 23.6         | 24.7         |
| Europe & C. Asia                   | 23.4         | 22.0         | 18.3         | 15.8         | 14.0         | 11.6         |
| L.A. & Caribbean                   | 18.5         | 15.3         | 13.4         | 11.5         | 11.4         | 11.5         |
| Mid East & N. Africa               | 9.2          | 10.5         | 11.4         | 12.5         | 13.2         | 14.3         |
| North America                      | 2.0          | 1.9          | 2.0          | 2.3          | 2.9          | 3.4          |
| South Asia                         | 17.7         | 21.7         | 26.0         | 28.2         | 28.1         | 27.4         |
| Sub-Saharan Africa                 | 7.1          | 7.0          | 7.2          | 6.8          | 6.8          | 7.1          |

366

367

**Table II.** Multivariable Poisson regression models for rates of mental health hospitalizations, emergency department visits and outpatient physician visits by immigration status and over time.

|                                                                                                                                                           | <b>Hospitalizations</b> | <b>Emergency department visits</b> | <b>Outpatient physician visits</b> |
|-----------------------------------------------------------------------------------------------------------------------------------------------------------|-------------------------|------------------------------------|------------------------------------|
| <b>Parameter</b>                                                                                                                                          | <b>RR (95% CI)</b>      | <b>RR (95% CI)</b>                 | <b>RR (95% CI)</b>                 |
| <b>Immigration Status</b> (Reference: Long-term residents)                                                                                                |                         |                                    |                                    |
| Recent immigrants                                                                                                                                         | 0.60 (0.56, 0.64)       | 0.49 (0.47, 0.52)                  | 0.60 (0.59, 0.61)                  |
| <b>Relative change per time period</b> (Reference period 1996-1998 for hospitalizations and outpatient visits, 2002-2004 for emergency department visits) |                         |                                    |                                    |
| Time trend – Recent immigrant                                                                                                                             | 1.05 (1.03, 1.07)       | 1.08 (1.05, 1.11)                  | 0.94 (0.93, 0.95)                  |
| Time trend – Long-term resident                                                                                                                           | 1.09 (1.08, 1.09)       | 1.15 (1.14, 1.15)                  | 1.03 (1.03, 1.03)                  |
| <b>Sex</b> (Reference: female)                                                                                                                            |                         |                                    |                                    |
| Male                                                                                                                                                      | 0.89 (0.87, 0.91)       | 0.80 (0.79, 0.82)                  | 0.85 (0.84, 0.85)                  |
| <b>Age</b> (Reference: 20 to 24 years)                                                                                                                    |                         |                                    |                                    |
| Age: 10 to 14 years                                                                                                                                       | 0.52 (0.51, 0.53)       | 0.43 (0.43, 0.44)                  | 0.49 (0.48, 0.49)                  |
| Age: 15 to 19 years                                                                                                                                       | 0.99 (0.98, 1.01)       | 1.11 (1.09, 1.12)                  | 0.75 (0.74, 0.75)                  |
| <b>Income</b> (Reference quintile 5)                                                                                                                      |                         |                                    |                                    |
| Income missing                                                                                                                                            | 1.98 (1.78, 2.21)       | 2.12 (1.97, 2.29)                  | 1.05 (0.99, 1.12)                  |
| Income quintile 1 (lowest)                                                                                                                                | 1.36 (1.32, 1.40)       | 1.62 (1.59, 1.65)                  | 1.03 (1.02, 1.04)                  |
| Income quintile 2                                                                                                                                         | 1.19 (1.16, 1.22)       | 1.32 (1.30, 1.35)                  | 0.95 (0.94, 0.96)                  |
| Income quintile 3                                                                                                                                         | 1.08 (1.05, 1.11)       | 1.16 (1.13, 1.18)                  | 0.91 (0.90, 0.92)                  |
| Income quintile 4                                                                                                                                         | 1.04 (1.01, 1.07)       | 1.07 (1.05, 1.09)                  | 0.90 (0.89, 0.91)                  |
| <b>Community size</b> (Reference: 1 500 000+)                                                                                                             |                         |                                    |                                    |
| 500 000 – 1 499 999                                                                                                                                       | 0.95 (0.92, 0.99)       | 1.46 (1.42, 1.50)                  | 1.09 (1.08, 1.10)                  |
| 100 000 – 499 999                                                                                                                                         | 1.33 (1.30, 1.36)       | 1.60 (1.57, 1.63)                  | 1.03 (1.03, 1.04)                  |
| 10 000 – 99 999                                                                                                                                           | 1.55 (1.50, 1.60)       | 1.98 (1.94, 2.03)                  | 0.94 (0.93, 0.96)                  |
| < 10 000                                                                                                                                                  | 1.23 (1.19, 1.27)       | 1.81 (1.77, 1.84)                  | 0.74 (0.74, 0.76)                  |

RR adjusted for immigration status, time, sex, age, neighbourhood income quintile, and community size.

**Table III.** Multivariable Poisson regression models for time trends in mental health hospitalizations, emergency department visits, and outpatient physician visits within recent immigrant groups.

|                              | <b>Hospitalizations</b> | <b>Emergency department visits</b> | <b>Outpatient physician visits</b> |
|------------------------------|-------------------------|------------------------------------|------------------------------------|
| <b>Parameter</b>             | <b>RR (95% CI)</b>      | <b>RR (95% CI)</b>                 | <b>RR (95% CI)</b>                 |
| <b>Immigration Class</b>     |                         |                                    |                                    |
| Non-refugees, 0 to 5 years   | 1.04 (1.01, 1.07)       | 1.04 (1.00, 1.07)                  | 0.93 (0.92, 0.94)                  |
| Non-refugees, ≥5 to 10 years | 1.01 (0.97, 1.05)       | 1.05 (1.01, 1.10)                  | 0.93 (0.92, 0.94)                  |
| Refugees, 0 to 5 years       | 1.02 (0.97, 1.08)       | 1.14 (1.07, 1.22)                  | 0.95 (0.93, 0.96)                  |
| Refugees, ≥5 to 10 years     | 1.12 (1.03, 1.21)       | 1.11 (1.02, 1.20)                  | 0.95 (0.93, 0.97)                  |
| <b>Region of Origin</b>      |                         |                                    |                                    |
| East Asia and Pacific        | 1.02 (0.97, 1.07)       | 1.10 (1.04, 1.17)                  | 0.93 (0.92, 0.94)                  |
| South Asia                   | 1.05 (1.00, 1.11)       | 1.08 (1.02, 1.14)                  | 0.92 (0.91, 0.94)                  |
| Sub-Saharan Africa           | 1.04 (0.97, 1.11)       | 1.10 (1.00, 1.20)                  | 0.89 (0.87, 0.91)                  |
| Middle East and North Africa | 0.98 (0.91, 1.05)       | 1.05 (0.98, 1.11)                  | 0.96 (0.94, 0.98)                  |
| Latin America and Caribbean  | 1.08 (1.03, 1.13)       | 1.12 (1.06, 1.18)                  | 0.95 (0.94, 0.97)                  |
| Europe and Central Asia      | 1.17 (1.11, 1.24)       | 1.16 (1.10, 1.22)                  | 1.01 (0.99, 1.03)                  |
| North America                | 1.00 (0.89, 1.14)       | 0.92 (0.76, 1.13)                  | 0.96 (0.91, 1.01)                  |
| Long-term Residents          | 1.09 (1.08, 1.09)       | 1.15 (1.14, 1.15)                  | 1.03 (1.03, 1.03)                  |

RR;s for immigration class adjusted for immigration class, time, sex, age, neighbourhood income quintile, and community size. RR's for region of origin adjusted for region of origin, time, sex, age, neighbourhood income quintile, and community size.

1  
2  
3 376 **Figure 1.** Acute care and outpatient physician visits for mental health problems over time by time  
4  
5 377 period in recent immigrants and long-term residents. (RR) Rate Ratio (CI) Confidence Interval  
6  
7 378 (ED) Emergency Department.  
8

9 379  
10  
11  
12 380 **Figure 2.** Acute care and outpatient visits for mental health problems over time by time period by  
13  
14 381 immigration class and recency of immigration. (ED) Emergency Department.  
15

16 382  
17  
18  
19 383 **Figure 3.** Acute care and outpatient mental health service use by time period and by region of  
20  
21 384 origin. (ED) Emergency Department.  
22

23  
24 385  
25  
26  
27 386 **Supplementary Figure 1.** Flow chart detailing an example of the application of the inclusion and  
28  
29 387 exclusion criteria for the 2011 and 2012 cohort period.  
30

31  
32 388

33  
34 389

35  
36  
37 390

38  
39 391  
40  
41  
42  
43  
44  
45  
46  
47  
48  
49  
50  
51  
52  
53  
54  
55  
56  
57  
58  
59  
60

1  
2  
3 392 **Abbreviations:**

4  
5 393 (CI) Confidence interval; (CIHI-DAD) Canadian Institute for Health Information Discharge

6  
7 394 Abstract Database; (ED) Emergency department; (ICES) Institute for Clinical Evaluative Sciences;

8  
9 395 (IRCC) Immigration, Refugees and Citizenship Canada; (LTR) Long-term resident; (NACRS)

10  
11 396 National Ambulatory Care Reporting System; (OHIP) Ontario Health Insurance Plan; (OMHRS)

12  
13  
14 397 Ontario Mental Health Reporting System; (RI) Recent immigrants; (RR) Rate ratio.

15  
16 398

17  
18  
19  
20  
21  
22  
23  
24  
25  
26  
27  
28  
29  
30  
31  
32  
33  
34  
35  
36  
37  
38  
39  
40  
41  
42  
43  
44  
45  
46  
47  
48  
49  
50  
51  
52  
53  
54  
55  
56  
57  
58  
59  
60

For peer review only

**References**

1. The Mental Health of Children and Youth in Ontario: A Baseline Scorecard. Toronto, ON: Institute for Clinical Evaluative Sciences, 2015.
2. Waddell C, Shepherd CA, Schwartz C, Barican J. Child and Youth Mental Disorders: Prevalence and Evidence-Based Interventions. Vancouver, BC: Children's Health Policy Centre, British Columbia Ministry of Children and Family Development, 2014.
3. Mapelli E, Black T, Doan Q. Trends in Pediatric Emergency Department Utilization for Mental Health-Related Visits. *The Journal of pediatrics*. 2015;167(4):905-10.
4. Olfson M, Druss BG, Marcus SC. Trends in mental health care among children and adolescents. *N Engl J Med*. 2015;372(21):2029-38.
5. Beiser M, Goodwill AM, Albanese P, McShane K, Nowakowski M. Predictors of immigrant children's mental health in Canada: selection, settlement contingencies, culture, or all of the above? *Social psychiatry and psychiatric epidemiology*. 2014;49(5):743-56.
6. Beiser M, Zilber N, Simich L, Youngmann R, Zohar AH, Taa B, et al. Regional effects on the mental health of immigrant children: results from the New Canadian Children and Youth Study (NCCYS). *Health & place*. 2011;17(3):822-9.
7. Beiser M, Hou F, Hyman I, Tousignant M. Poverty, family process, and the mental health of immigrant children in Canada. *American journal of public health*. 2002;92(2):220-7.
8. Facts and figures 2013. Immigration overview – permanent and temporary residents. : Immigration, Refugees and Citizenship Canada; 2013 [cited 2016 July 19th]. Available from: <http://www.cic.gc.ca/english/resources/statistics/facts2013/index.asp>.
9. Immigration and Refugee Protection Act. Government of Canada; 2001.
10. Bragg B. A Guide to Canada's Changing Immigration Policy. Calgary, AB: Ethno-Cultural Council of Calgary., 2013.

- 1  
2  
3 423 11. deKeyser L, Svedin CG, Agnafors S, Bladh M, Sydsjo G. Multi-informant reports of mental  
4  
5 424 health in Swedish-born children of immigrants and children born to non-immigrants - the SESBiC-  
6  
7 425 study. *BMC pediatrics*. 2014;14:95.  
8  
9 426 12. Huang ZJ, Yu SM, Ledsky R. Health status and health service access and use among  
10  
11 427 children in U.S. immigrant families. *American journal of public health*. 2006;96(4):634-40.  
12  
13  
14 428 13. Vollebergh WA, ten Have M, Dekovic M, Oosterwegel A, Pels T, Veenstra R, et al. Mental  
15  
16 429 health in immigrant children in the Netherlands. *Social psychiatry and psychiatric epidemiology*.  
17  
18 430 2005;40(6):489-96.  
19  
20  
21 431 14. Akhtar-Danesh N, Landeen J. Relation between depression and sociodemographic factors.  
22  
23 432 *International journal of mental health systems*. 2007;1(1):4.  
24  
25  
26 433 15. Lofors J, Ramirez-Leon V, Sundquist K. Neighbourhood income and anxiety: a study based  
27  
28 434 on random samples of the Swedish population. *European journal of public health*. 2006;16(6):633-  
29  
30 435 9.  
31  
32 436 16. Fazel M, Reed RV, Panter-Brick C, Stein A. Mental health of displaced and refugee  
33  
34 437 children resettled in high-income countries: risk and protective factors. *The Lancet*.  
35  
36 438 2012;379(9812):266-82.  
37  
38  
39 439 17. Cantor-Graae E, Pedersen CB. Full spectrum of psychiatric disorders related to foreign  
40  
41 440 migration: a Danish population-based cohort study. *JAMA psychiatry*. 2013;70(4):427-35.  
42  
43  
44 441 18. Durbin A, Moineddin R, Lin E, Steele LS, Glazier RH. Mental health service use by recent  
45  
46 442 immigrants from different world regions and by non-immigrants in Ontario, Canada: a cross-  
47  
48 443 sectional study. *BMC health services research*. 2015;15:336.  
49  
50  
51 444 19. Ivert AK, Merlo J, Svensson R, Levander MT. How are immigrant background and gender  
52  
53 445 associated with the utilisation of psychiatric care among adolescents? *Social psychiatry and*  
54  
55 446 *psychiatric epidemiology*. 2013;48(5):693-9.  
56  
57  
58  
59  
60

- 1  
2  
3 447 20. Kwak K, Rudmin F. Adolescent health and adaptation in Canada: examination of gender  
4  
5 448 and age aspects of the healthy immigrant effect. *International journal for equity in health*.  
6  
7 449 2014;13(1):103.  
8  
9 450 21. Hansson EK, Tuck A, Lurie S, McKenzie K. Rates of mental illness and suicidality in  
10  
11 451 immigrant, refugee, ethnocultural, and racialized groups in Canada: a review of the literature.  
12  
13 452 *Canadian journal of psychiatry Revue canadienne de psychiatrie*. 2012;57(2):111-21.  
14  
15 453 22. Pietrus M. *Opening Minds Interim Report*. Calgary, AB: Mental Health Commission of  
16  
17 454 Canada, 2013.  
18  
19 455 23. Ontario Health Insurance Act: Ontario Ministry of Health and Long-Term Care; 2015  
20  
21 456 [November 13, 2015]. Available from: <http://www.ontario.ca/laws/regulation/900552>.  
22  
23 457 24. The World Bank Regions 2015 [November 13, 2015]. Available from:  
24  
25 458 <http://www.worldbank.org/en/about/annual-report/regions>.  
26  
27 459 25. Steele LS, Glazier RH, Lin E, Evans M. Using administrative data to measure ambulatory  
28  
29 460 mental health service provision in primary care. *Medical care*. 2004;42(10):960-5.  
30  
31 461 26. Durbin A, Lin E, Moineddin R, Steele LS, Glazier RH. Use of mental health care for  
32  
33 462 nonpsychotic conditions by immigrants in different admission classes and by refugees in Ontario,  
34  
35 463 Canada. *Open Medicine*. 2014;8(4):e136.  
36  
37 464 27. Huang KY, Calzada E, Cheng S, Brotman LM. Physical and mental health disparities  
38  
39 465 among young children of Asian immigrants. *The Journal of pediatrics*. 2012;160(2):331-6 e1.  
40  
41 466 28. Dekeyser L, Svedin CG, Agnafors S, Sydsjo G. Self-reported mental health in 12-year-old  
42  
43 467 second-generation immigrant children in Sweden. *Nordic journal of psychiatry*. 2011;65(6):389-95.  
44  
45 468 29. Barghadouch A, Kristiansen M, Jervelund SS, Hjern A, Montgomery E, Norredam M.  
46  
47 469 Refugee children have fewer contacts to psychiatric healthcare services: an analysis of a subset of  
48  
49  
50  
51  
52  
53  
54  
55  
56  
57  
58  
59  
60



- 1  
2  
3 470 refugee children compared to Danish-born peers. *Social psychiatry and psychiatric epidemiology*.  
4  
5 471 2016;51(8):1125-36.  
6  
7 472 30. Kim IH, Carrasco C, Muntaner C, McKenzie K, Noh S. Ethnicity and postmigration health  
8  
9 473 trajectory in new immigrants to Canada. *American journal of public health*. 2013;103(4):e96-104.  
10  
11 474 31. Durbin A, Moineddin R, Lin E, Steele LS, Glazier RH. Examining the relationship between  
12  
13 475 neighbourhood deprivation and mental health service use of immigrants in Ontario, Canada: a  
14  
15 476 cross-sectional study. *BMJ open*. 2015;5(3):e006690.  
16  
17  
18 477 32. Osypuk TL, Alonso A, Bates LM. Understanding the Healthy Immigrant Effect and  
19  
20 478 Cardiovascular Disease: Looking to Big Data and Beyond. *Circulation*. 2015;132(16):1522-4.  
21  
22  
23 479 33. Urquia ML, Frank JW, Glazier RH. From places to flows. *International secondary migration*  
24  
25 480 and birth outcomes. *Social science & medicine*. 2010;71(9):1620-6.  
26  
27  
28 481 34. Guttman A, Manuel D, Stukel TA, Desmeules M, Cernat G, Glazier RH. Immunization  
29  
30 482 coverage among young children of urban immigrant mothers: findings from a universal health care  
31  
32 483 system. *Ambul Pediatr*. 2008;8(3):205-9.  
33  
34  
35 484 35. Perera J, Wand T, Bein KJ, Chalkley D, Ivers R, Steinbeck KS, et al. Presentations to NSW  
36  
37 485 emergency departments with self-harm, suicidal ideation, or intentional poisoning, 2010-2014. *The*  
38  
39 486 *Medical journal of Australia*. 2018;208(8):348-53.  
40  
41  
42 487 36. Open minds, healthy minds: Ontario's Comprehensive Mental Health and Addictions  
43  
44 488 Strategy.: Government of Ontario; 2011 [cited 2015 November 13th, ]. Available from:  
45  
46 489 [http://www.health.gov.on.ca/en/common/ministry/publications/reports/mental\\_health2011/mentalhe](http://www.health.gov.on.ca/en/common/ministry/publications/reports/mental_health2011/mentalhe)  
47  
48 490 [alth.aspx](http://www.health.gov.on.ca/en/common/ministry/publications/reports/mental_health2011/mentalhealth.aspx).  
49  
50  
51 491 37. A shared responsibility: Ontario's policy framework for child and youth mental health.:  
52  
53 492 Ontario Ministry of Children and Youth Services; 2006 [cited 2015 November 13, 2015]. Available  
54  
55 493 from:

1  
2  
3 494 <http://www.children.gov.on.ca/htdocs/English/topics/specialneeds/mentalhealth/sharedresponsibilit>  
4  
5 495 [y.aspx](#).

6  
7 496 38. Puyat JH. Is the influence of social support on mental health the same for immigrants and  
8  
9 497 non-immigrants? Journal of immigrant and minority health / Center for Minority Public Health.  
10  
11 498 2013;15(3):598-605.

12  
13  
14 499 39. Glazier R, Zagorski B, Rayner J. Comparison of Primary Care Models in Ontario by  
15  
16 500 Demographics, Case Mix and Emergency Department Use, 2008/09 to 2009/10. ICES Investigative  
17  
18 501 Report. Toronto: Institute for Clinical Evaluative Sciences, 2012.

19  
20  
21  
22 502  
23  
24  
25  
26  
27  
28  
29  
30  
31  
32  
33  
34  
35  
36  
37  
38  
39  
40  
41  
42  
43  
44  
45  
46  
47  
48  
49  
50  
51  
52  
53  
54  
55  
56  
57  
58  
59  
60

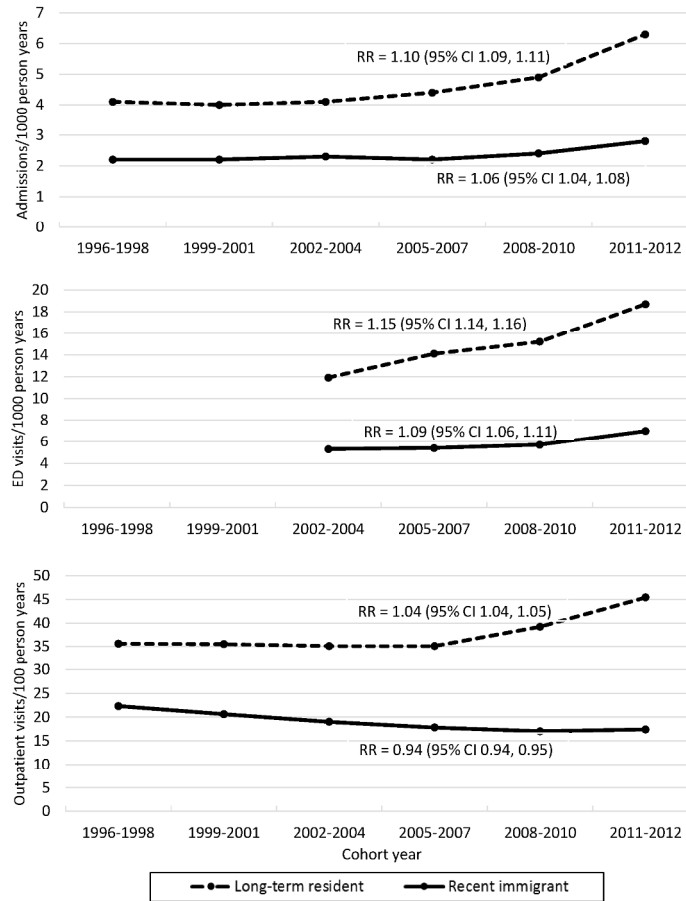

Figure 1. Acute care and outpatient physician visits for mental health problems over time by time period in recent immigrants and long-term residents. (RR) Rate Ratio (CI) Confidence Interval (ED) Emergency Department.

215x279mm (300 x 300 DPI)



Figure 2. Acute care and outpatient visits for mental health problems over time by time period by immigration class and recency of immigration. (ED) Emergency Department.

215x279mm (300 x 300 DPI)



Figure 3. Acute care and outpatient mental health service use by time period and by region of origin. (ED) Emergency Department.

215x279mm (300 x 300 DPI)

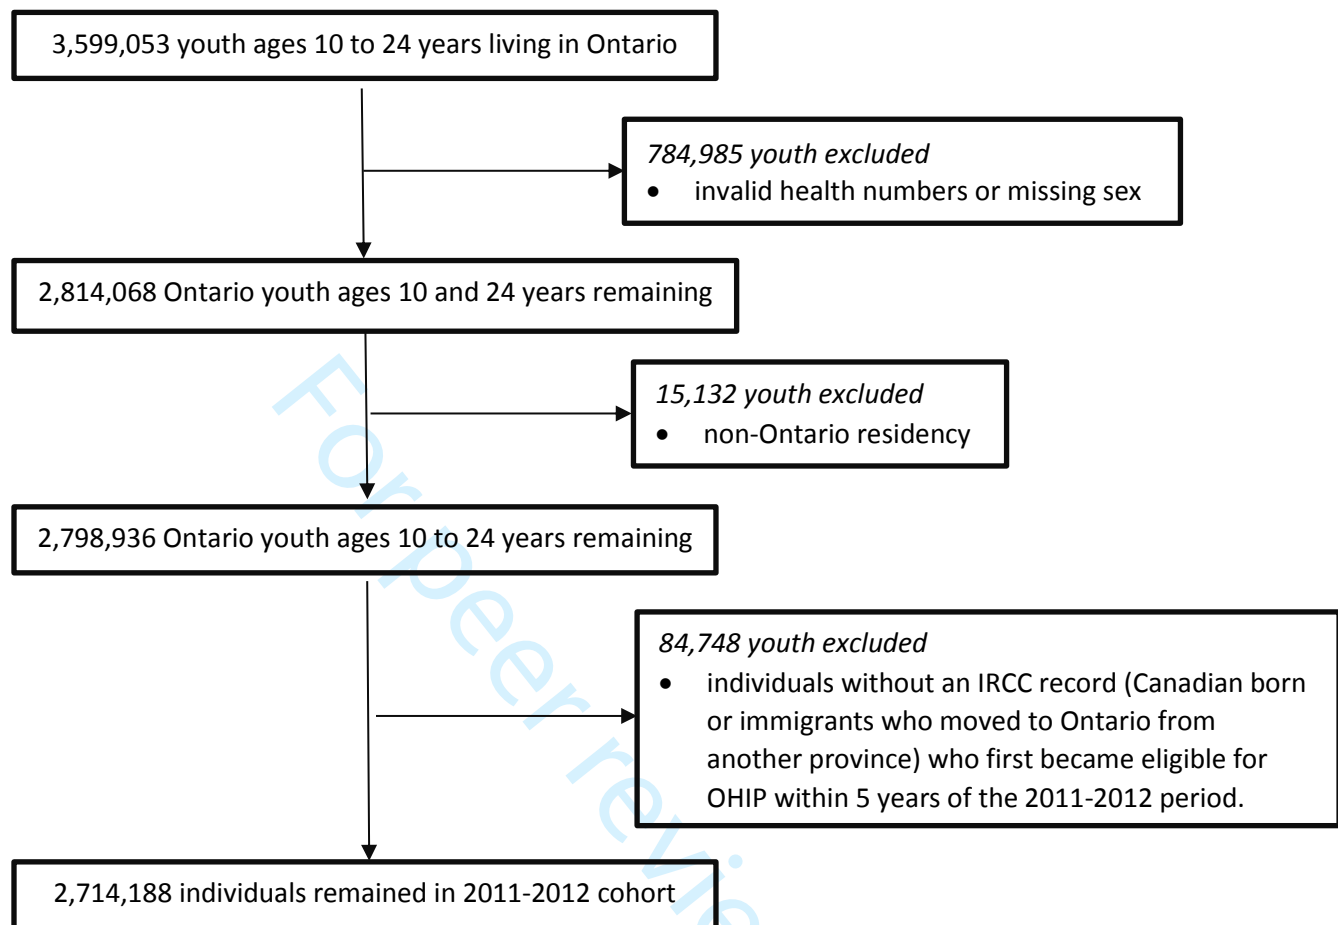

Supplementary Figure 1.

## Appendix A

Medical record codes used to identify mental health visits to outpatient physicians, emergency departments, and hospitals in Ontario, 1996 to 2012.

### Outpatient Mental Health Diagnostic Codes from the Ontario Health Insurance Plan

Any office-based visit to a psychiatrist or any office based visit to a family practitioner or pediatrician with any mental health counselling code or a service code with any of the following diagnoses:

| <i>Code</i> | <i>Diagnosis</i>                                                                               |
|-------------|------------------------------------------------------------------------------------------------|
| 291         | Alcoholic psychosis, delirium tremens, Korsakov's psychosis                                    |
| 292         | Drug psychosis                                                                                 |
| 295         | Schizophrenia                                                                                  |
| 296         | Manic-depressive psychoses, involuntional melancholia                                          |
| 297         | Other paranoid states                                                                          |
| 298         | Other psychoses                                                                                |
| 299         | Child Psychoses (e.g. Autism)                                                                  |
| 300         | Anxiety neurosis, hysteria, neurasthenia, obsessive-compulsive neurosis, reactive depression   |
| 301         | Personality disorders                                                                          |
| 302         | Sexual deviations                                                                              |
| 303         | Alcoholism                                                                                     |
| 304         | Drug dependence                                                                                |
| 305         | Tobacco abuse                                                                                  |
| 306         | Psychosomatic illness                                                                          |
| 307         | Habit spasms, tics, stuttering, tension headaches, anorexia nervosa, sleep disorders, enuresis |
| 309         | Adjustment reaction                                                                            |
| 311         | Depressive disorder                                                                            |
| 313         | Behaviour disorders of childhood and adolescence                                               |
| 314         | Hyperkinetic syndrome of childhood                                                             |
| 897         | Economic problems                                                                              |
| 898         | Marital difficulties                                                                           |
| 899         | Parent-child problems                                                                          |
| 900         | Problems with aged parents or in-laws                                                          |
| 901         | Family disruption/divorce                                                                      |
| 902         | Education problems                                                                             |
| 904         | Social maladjustment                                                                           |
| 905         | Occupational problems                                                                          |
| 906         | Legal problems                                                                                 |
| 909         | Other problems of social adjustment                                                            |

### **Mental Health Diagnoses and Codes for Emergency Department Discharges**

| <u>Year (s)</u> | <u>Codes Type</u> | <u>Variable</u> | <u>Code</u>                        |
|-----------------|-------------------|-----------------|------------------------------------|
| 2001 – 2002     | ICD-9-CA          | Main Diagnosis  | 290 – 319 (except 290.X and 294.X) |
| OR              |                   |                 |                                    |
| 2001 – 2002     | ICD-9-CA          | Any Diagnosis   | E950-E959                          |
|                 |                   |                 |                                    |
| 2002 - 2012     | ICD-10-CA         | Main Diagnosis  | F04 – F99                          |
| OR              |                   |                 |                                    |
| 2002 – 2012     | ICD-10-CA         | Any Diagnosis   | X60 - 84                           |

### **Mental Health Diagnoses and Codes for Mental Health Hospitalizations**

Any hospitalization to a designated mental health hospital bed or any hospitalization where:

| <u>Year (s)</u> | <u>Codes Type</u> | <u>Variable</u>            | <u>Code</u>                        |
|-----------------|-------------------|----------------------------|------------------------------------|
| 1996 – 2002     | ICD-9-CA          | Most Responsible Diagnosis | 290 – 319 (except 290.X and 294.X) |
| 2002-2012       | ICD-10-CA         | Most Responsible Diagnosis | F04 – F99                          |



**The RECORD statement – checklist of items, extended from the STROBE statement, that should be reported in observational studies using routinely collected health data.**

|                           | Item No. | STROBE items                                                                                                                                                                               | Location in manuscript where items are reported | RECORD items                                                                                                                                                                                                                                                                                                                                                                                                                                | Location in manuscript where items are reported |
|---------------------------|----------|--------------------------------------------------------------------------------------------------------------------------------------------------------------------------------------------|-------------------------------------------------|---------------------------------------------------------------------------------------------------------------------------------------------------------------------------------------------------------------------------------------------------------------------------------------------------------------------------------------------------------------------------------------------------------------------------------------------|-------------------------------------------------|
| <b>Title and abstract</b> |          |                                                                                                                                                                                            |                                                 |                                                                                                                                                                                                                                                                                                                                                                                                                                             |                                                 |
|                           | 1        | (a) Indicate the study's design with a commonly used term in the title or the abstract (b) Provide in the abstract an informative and balanced summary of what was done and what was found | Page 1&3                                        | RECORD 1.1: The type of data used should be specified in the title or abstract. When possible, the name of the databases used should be included.<br><br>RECORD 1.2: If applicable, the geographic region and timeframe within which the study took place should be reported in the title or abstract.<br><br>RECORD 1.3: If linkage between databases was conducted for the study, this should be clearly stated in the title or abstract. | Page 1&3<br><br>Page 3<br><br>Page 3            |
| <b>Introduction</b>       |          |                                                                                                                                                                                            |                                                 |                                                                                                                                                                                                                                                                                                                                                                                                                                             |                                                 |
| Background rationale      | 2        | Explain the scientific background and rationale for the investigation being reported                                                                                                       | Page 6&7                                        |                                                                                                                                                                                                                                                                                                                                                                                                                                             |                                                 |
| Objectives                | 3        | State specific objectives, including any prespecified hypotheses                                                                                                                           | Page 7&8                                        |                                                                                                                                                                                                                                                                                                                                                                                                                                             |                                                 |
| <b>Methods</b>            |          |                                                                                                                                                                                            |                                                 |                                                                                                                                                                                                                                                                                                                                                                                                                                             |                                                 |
| Study Design              | 4        | Present key elements of study design early in the paper                                                                                                                                    | Page 8                                          |                                                                                                                                                                                                                                                                                                                                                                                                                                             |                                                 |
| Setting                   | 5        | Describe the setting, locations, and relevant dates, including periods of recruitment, exposure, follow-up, and data collection                                                            | Page 8                                          |                                                                                                                                                                                                                                                                                                                                                                                                                                             |                                                 |
| Participants              | 6        | (a) <i>Cohort study</i> - Give the eligibility                                                                                                                                             | Page 8                                          | RECORD 6.1: The methods of study                                                                                                                                                                                                                                                                                                                                                                                                            | Page 8                                          |

|                                                                                                                                                                                                       |                              |                                                                                                                                                                                                                                                                                                                                                                                                                                                                                                                                                                                                                                                                               |                                                                                                                                                                                      |                                                                                                                                                                                                                                                                                                                                                                                                                                                                                                                                                                                                                                                                     |                                                                                                                                                                                                                        |         |
|-------------------------------------------------------------------------------------------------------------------------------------------------------------------------------------------------------|------------------------------|-------------------------------------------------------------------------------------------------------------------------------------------------------------------------------------------------------------------------------------------------------------------------------------------------------------------------------------------------------------------------------------------------------------------------------------------------------------------------------------------------------------------------------------------------------------------------------------------------------------------------------------------------------------------------------|--------------------------------------------------------------------------------------------------------------------------------------------------------------------------------------|---------------------------------------------------------------------------------------------------------------------------------------------------------------------------------------------------------------------------------------------------------------------------------------------------------------------------------------------------------------------------------------------------------------------------------------------------------------------------------------------------------------------------------------------------------------------------------------------------------------------------------------------------------------------|------------------------------------------------------------------------------------------------------------------------------------------------------------------------------------------------------------------------|---------|
| 1<br>2<br>3<br>4<br>5<br>6<br>7<br>8<br>9<br>10<br>11<br>12<br>13<br>14<br>15<br>16<br>17<br>18<br>19<br>20<br>21<br>22<br>23<br>24<br>25<br>26<br>27<br>28<br>29<br>30<br>31<br>32<br>33<br>34<br>35 |                              | <p>criteria, and the sources and methods of selection of participants. Describe methods of follow-up</p> <p><i>Case-control study</i> - Give the eligibility criteria, and the sources and methods of case ascertainment and control selection. Give the rationale for the choice of cases and controls</p> <p><i>Cross-sectional study</i> - Give the eligibility criteria, and the sources and methods of selection of participants</p> <p><i>(b) Cohort study</i> - For matched studies, give matching criteria and number of exposed and unexposed</p> <p><i>Case-control study</i> - For matched studies, give matching criteria and the number of controls per case</p> |                                                                                                                                                                                      | <p>population selection (such as codes or algorithms used to identify subjects) should be listed in detail. If this is not possible, an explanation should be provided.</p> <p>RECORD 6.2: Any validation studies of the codes or algorithms used to select the population should be referenced. If validation was conducted for this study and not published elsewhere, detailed methods and results should be provided.</p> <p>RECORD 6.3: If the study involved linkage of databases, consider use of a flow diagram or other graphical display to demonstrate the data linkage process, including the number of individuals with linked data at each stage.</p> | <p>Page 10</p> <p>N/A</p>                                                                                                                                                                                              |         |
| 36<br>37<br>38<br>39<br>40<br>41<br>42<br>43<br>44                                                                                                                                                    | Variables                    | 7                                                                                                                                                                                                                                                                                                                                                                                                                                                                                                                                                                                                                                                                             | Clearly define all outcomes, exposures, predictors, potential confounders, and effect modifiers. Give diagnostic criteria, if applicable.                                            | Page 9&10                                                                                                                                                                                                                                                                                                                                                                                                                                                                                                                                                                                                                                                           | <p>RECORD 7.1: A complete list of codes and algorithms used to classify exposures, outcomes, confounders, and effect modifiers should be provided. If these cannot be reported, an explanation should be provided.</p> | Page 10 |
| 45<br>46<br>47<br>48<br>49<br>50<br>51<br>52<br>53<br>54<br>55<br>56                                                                                                                                  | Data sources/<br>measurement | 8                                                                                                                                                                                                                                                                                                                                                                                                                                                                                                                                                                                                                                                                             | For each variable of interest, give sources of data and details of methods of assessment (measurement). Describe comparability of assessment methods if there is more than one group | Page 8                                                                                                                                                                                                                                                                                                                                                                                                                                                                                                                                                                                                                                                              |                                                                                                                                                                                                                        |         |

|                                                                                                                                                                                                    |                                  |    |                                                                                                                                                                                                                                                                                                                                                                                                                                                                                                                                                                      |                                                         |                                                                                                                                                       |        |
|----------------------------------------------------------------------------------------------------------------------------------------------------------------------------------------------------|----------------------------------|----|----------------------------------------------------------------------------------------------------------------------------------------------------------------------------------------------------------------------------------------------------------------------------------------------------------------------------------------------------------------------------------------------------------------------------------------------------------------------------------------------------------------------------------------------------------------------|---------------------------------------------------------|-------------------------------------------------------------------------------------------------------------------------------------------------------|--------|
| 1<br>2<br>3                                                                                                                                                                                        | Bias                             | 9  | Describe any efforts to address potential sources of bias                                                                                                                                                                                                                                                                                                                                                                                                                                                                                                            | Page 9                                                  |                                                                                                                                                       |        |
| 4<br>5<br>6<br>7<br>8                                                                                                                                                                              | Study size                       | 10 | Explain how the study size was arrived at                                                                                                                                                                                                                                                                                                                                                                                                                                                                                                                            | N/A – Entire provincial population of children included |                                                                                                                                                       |        |
| 9<br>10<br>11<br>12<br>13<br>14<br>15<br>16<br>17                                                                                                                                                  | Quantitative variables           | 11 | Explain how quantitative variables were handled in the analyses. If applicable, describe which groupings were chosen, and why                                                                                                                                                                                                                                                                                                                                                                                                                                        | Page 10&11                                              |                                                                                                                                                       |        |
| 18<br>19<br>20<br>21<br>22<br>23<br>24<br>25<br>26<br>27<br>28<br>29<br>30<br>31<br>32<br>33<br>34<br>35<br>36<br>37<br>38<br>39<br>40<br>41<br>42<br>43<br>44<br>45<br>46<br>47<br>48<br>49<br>50 | Statistical methods              | 12 | (a) Describe all statistical methods, including those used to control for confounding<br>(b) Describe any methods used to examine subgroups and interactions<br>(c) Explain how missing data were addressed<br>(d) <i>Cohort study</i> - If applicable, explain how loss to follow-up was addressed<br><i>Case-control study</i> - If applicable, explain how matching of cases and controls was addressed<br><i>Cross-sectional study</i> - If applicable, describe analytical methods taking account of sampling strategy<br>(e) Describe any sensitivity analyses | Page 11                                                 |                                                                                                                                                       |        |
| 51<br>52<br>53<br>54<br>55<br>56<br>57<br>58<br>59                                                                                                                                                 | Data access and cleaning methods |    | ..                                                                                                                                                                                                                                                                                                                                                                                                                                                                                                                                                                   |                                                         | RECORD 12.1: Authors should describe the extent to which the investigators had access to the database population used to create the study population. | Page 2 |

|                  |    |                                                                                                                                                                                                                                                                                                                                                 |            |                                                                                                                                                                                                                                                                                                                    |         |
|------------------|----|-------------------------------------------------------------------------------------------------------------------------------------------------------------------------------------------------------------------------------------------------------------------------------------------------------------------------------------------------|------------|--------------------------------------------------------------------------------------------------------------------------------------------------------------------------------------------------------------------------------------------------------------------------------------------------------------------|---------|
|                  |    |                                                                                                                                                                                                                                                                                                                                                 |            | RECORD 12.2: Authors should provide information on the data cleaning methods used in the study.                                                                                                                                                                                                                    | Page 9  |
| Linkage          |    | ..                                                                                                                                                                                                                                                                                                                                              |            | RECORD 12.3: State whether the study included person-level, institutional-level, or other data linkage across two or more databases. The methods of linkage and methods of linkage quality evaluation should be provided.                                                                                          | Page 8  |
| <b>Results</b>   |    |                                                                                                                                                                                                                                                                                                                                                 |            |                                                                                                                                                                                                                                                                                                                    |         |
| Participants     | 13 | (a) Report the numbers of individuals at each stage of the study ( <i>e.g.</i> , numbers potentially eligible, examined for eligibility, confirmed eligible, included in the study, completing follow-up, and analysed)<br>(b) Give reasons for non-participation at each stage.<br>(c) Consider use of a flow diagram                          | Page 11    | RECORD 13.1: Describe in detail the selection of the persons included in the study ( <i>i.e.</i> , study population selection) including filtering based on data quality, data availability and linkage. The selection of included persons can be described in the text and/or by means of the study flow diagram. | Page 11 |
| Descriptive data | 14 | (a) Give characteristics of study participants ( <i>e.g.</i> , demographic, clinical, social) and information on exposures and potential confounders<br>(b) Indicate the number of participants with missing data for each variable of interest<br>(c) <i>Cohort study</i> - summarise follow-up time ( <i>e.g.</i> , average and total amount) | Page 11    |                                                                                                                                                                                                                                                                                                                    |         |
| Outcome data     | 15 | <i>Cohort study</i> - Report numbers of outcome                                                                                                                                                                                                                                                                                                 | Page 11&12 |                                                                                                                                                                                                                                                                                                                    |         |

|                   |    |                                                                                                                                                                                                                                                                                                                                                                                                                 |                        |                                                                                                                                                                                                                                      |            |
|-------------------|----|-----------------------------------------------------------------------------------------------------------------------------------------------------------------------------------------------------------------------------------------------------------------------------------------------------------------------------------------------------------------------------------------------------------------|------------------------|--------------------------------------------------------------------------------------------------------------------------------------------------------------------------------------------------------------------------------------|------------|
|                   |    | events or summary measures over time<br><i>Case-control study</i> - Report numbers in each exposure category, or summary measures of exposure<br><i>Cross-sectional study</i> - Report numbers of outcome events or summary measures                                                                                                                                                                            |                        |                                                                                                                                                                                                                                      |            |
| Main results      | 16 | (a) Give unadjusted estimates and, if applicable, confounder-adjusted estimates and their precision (e.g., 95% confidence interval). Make clear which confounders were adjusted for and why they were included<br>(b) Report category boundaries when continuous variables were categorized<br>(c) If relevant, consider translating estimates of relative risk into absolute risk for a meaningful time period | Page 11, 12 and tables |                                                                                                                                                                                                                                      |            |
| Other analyses    | 17 | Report other analyses done—e.g., analyses of subgroups and interactions, and sensitivity analyses                                                                                                                                                                                                                                                                                                               | Page 12                |                                                                                                                                                                                                                                      |            |
| <b>Discussion</b> |    |                                                                                                                                                                                                                                                                                                                                                                                                                 |                        |                                                                                                                                                                                                                                      |            |
| Key results       | 18 | Summarise key results with reference to study objectives                                                                                                                                                                                                                                                                                                                                                        | Page 13                |                                                                                                                                                                                                                                      |            |
| Limitations       | 19 | Discuss limitations of the study, taking into account sources of potential bias or imprecision. Discuss both direction and magnitude of any potential bias                                                                                                                                                                                                                                                      | Page 14&15             | RECORD 19.1: Discuss the implications of using data that were not created or collected to answer the specific research question(s). Include discussion of misclassification bias, unmeasured confounding, missing data, and changing | Page 14&15 |

|                                                           |    |                                                                                                                                                                            |            |                                                                                                                                                          |        |
|-----------------------------------------------------------|----|----------------------------------------------------------------------------------------------------------------------------------------------------------------------------|------------|----------------------------------------------------------------------------------------------------------------------------------------------------------|--------|
|                                                           |    |                                                                                                                                                                            |            | eligibility over time, as they pertain to the study being reported.                                                                                      |        |
| Interpretation                                            | 20 | Give a cautious overall interpretation of results considering objectives, limitations, multiplicity of analyses, results from similar studies, and other relevant evidence | Page 13-16 |                                                                                                                                                          |        |
| Generalisability                                          | 21 | Discuss the generalisability (external validity) of the study results                                                                                                      | Page 13    |                                                                                                                                                          |        |
| <b>Other Information</b>                                  |    |                                                                                                                                                                            |            |                                                                                                                                                          |        |
| Funding                                                   | 22 | Give the source of funding and the role of the funders for the present study and, if applicable, for the original study on which the present article is based              | Page 1&2   |                                                                                                                                                          |        |
| Accessibility of protocol, raw data, and programming code |    | ..                                                                                                                                                                         |            | RECORD 22.1: Authors should provide information on how to access any supplemental information such as the study protocol, raw data, or programming code. | Page 1 |

\*Reference: Benchimol EI, Smeeth L, Guttman A, Harron K, Moher D, Petersen I, Sørensen HT, von Elm E, Langan SM, the RECORD Working Committee. The REporting of studies Conducted using Observational Routinely-collected health Data (RECORD) Statement. *PLoS Medicine* 2015; in press.

\*Checklist is protected under Creative Commons Attribution ([CC BY](https://creativecommons.org/licenses/by/4.0/)) license.
