# Supplementary material for: Trends in mental health service utilisation in immigrant youth in Ontario, Canada, 1996–2012: a population-based longitudinal cohort study
Source: PubMed Central journal article supplement — BMJ Open. 2018 Sep 17;8(9):e022647. doi: 10.1136/bmjopen-2018-022647 (PMC6144399; doi:10.1136/bmjopen-2018-022647), 2018-09-17
Supplement: bmjopen-2018-022647supp001.pdf [file bmjopen-2018-022647supp001.pdf]

## Appendix A

**Medical record codes used to identify mental health visits to outpatient physicians, emergency departments, and hospitals in Ontario, 1996 to 2012.**

### Outpatient Mental Health Diagnostic Codes from the Ontario Health Insurance Plan

Any office-based visit to a psychiatrist or any office based visit to a family practitioner or pediatrician with any mental health counselling code or a service code with any of the following diagnoses:

| <i>Code</i> | <i>Diagnosis</i>                                                                               |
|-------------|------------------------------------------------------------------------------------------------|
| 291         | Alcoholic psychosis, delirium tremens, Korsakov's psychosis                                    |
| 292         | Drug psychosis                                                                                 |
| 295         | Schizophrenia                                                                                  |
| 296         | Manic-depressive psychoses, involuntional melancholia                                          |
| 297         | Other paranoid states                                                                          |
| 298         | Other psychoses                                                                                |
| 299         | Child Psychoses (e.g. Autism)                                                                  |
| 300         | Anxiety neurosis, hysteria, neurasthenia, obsessive-compulsive neurosis, reactive depression   |
| 301         | Personality disorders                                                                          |
| 302         | Sexual deviations                                                                              |
| 303         | Alcoholism                                                                                     |
| 304         | Drug dependence                                                                                |
| 305         | Tobacco abuse                                                                                  |
| 306         | Psychosomatic illness                                                                          |
| 307         | Habit spasms, tics, stuttering, tension headaches, anorexia nervosa, sleep disorders, enuresis |
| 309         | Adjustment reaction                                                                            |
| 311         | Depressive disorder                                                                            |
| 313         | Behaviour disorders of childhood and adolescence                                               |
| 314         | Hyperkinetic syndrome of childhood                                                             |
| 897         | Economic problems                                                                              |
| 898         | Marital difficulties                                                                           |
| 899         | Parent-child problems                                                                          |
| 900         | Problems with aged parents or in-laws                                                          |
| 901         | Family disruption/divorce                                                                      |
| 902         | Education problems                                                                             |
| 904         | Social maladjustment                                                                           |
| 905         | Occupational problems                                                                          |
| 906         | Legal problems                                                                                 |
| 909         | Other problems of social adjustment                                                            |

### **Mental Health Diagnoses and Codes for Emergency Department Discharges**

| <u>Year (s)</u> | <u>Codes Type</u> | <u>Variable</u> | <u>Code</u>                        |
|-----------------|-------------------|-----------------|------------------------------------|
| 2001 – 2002     | ICD-9-CA          | Main Diagnosis  | 290 – 319 (except 290.X and 294.X) |
| OR              |                   |                 |                                    |
| 2001 – 2002     | ICD-9-CA          | Any Diagnosis   | E950-E959                          |
| 2002 - 2012     | ICD-10-CA         | Main Diagnosis  | F04 – F99                          |
| OR              |                   |                 |                                    |
| 2002 – 2012     | ICD-10-CA         | Any Diagnosis   | X60 - 84                           |

### **Mental Health Diagnoses and Codes for Mental Health Hospitalizations**

Any hospitalization to a designated mental health hospital bed or any hospitalization where:

| <u>Year (s)</u> | <u>Codes Type</u> | <u>Variable</u>            | <u>Code</u>                        |
|-----------------|-------------------|----------------------------|------------------------------------|
| 1996 – 2002     | ICD-9-CA          | Most Responsible Diagnosis | 290 – 319 (except 290.X and 294.X) |
| 2002-2012       | ICD-10-CA         | Most Responsible Diagnosis | F04 – F99                          |
