# Supplementary figures and images for: Trends in mental health service utilisation in immigrant youth in Ontario, Canada, 1996–2012: a population-based longitudinal cohort study
Source: PubMed Central journal article supplement — BMJ Open. 2018 Sep 17;8(9):e022647. doi: 10.1136/bmjopen-2018-022647 (PMC6144399; doi:10.1136/bmjopen-2018-022647), 2018-09-17

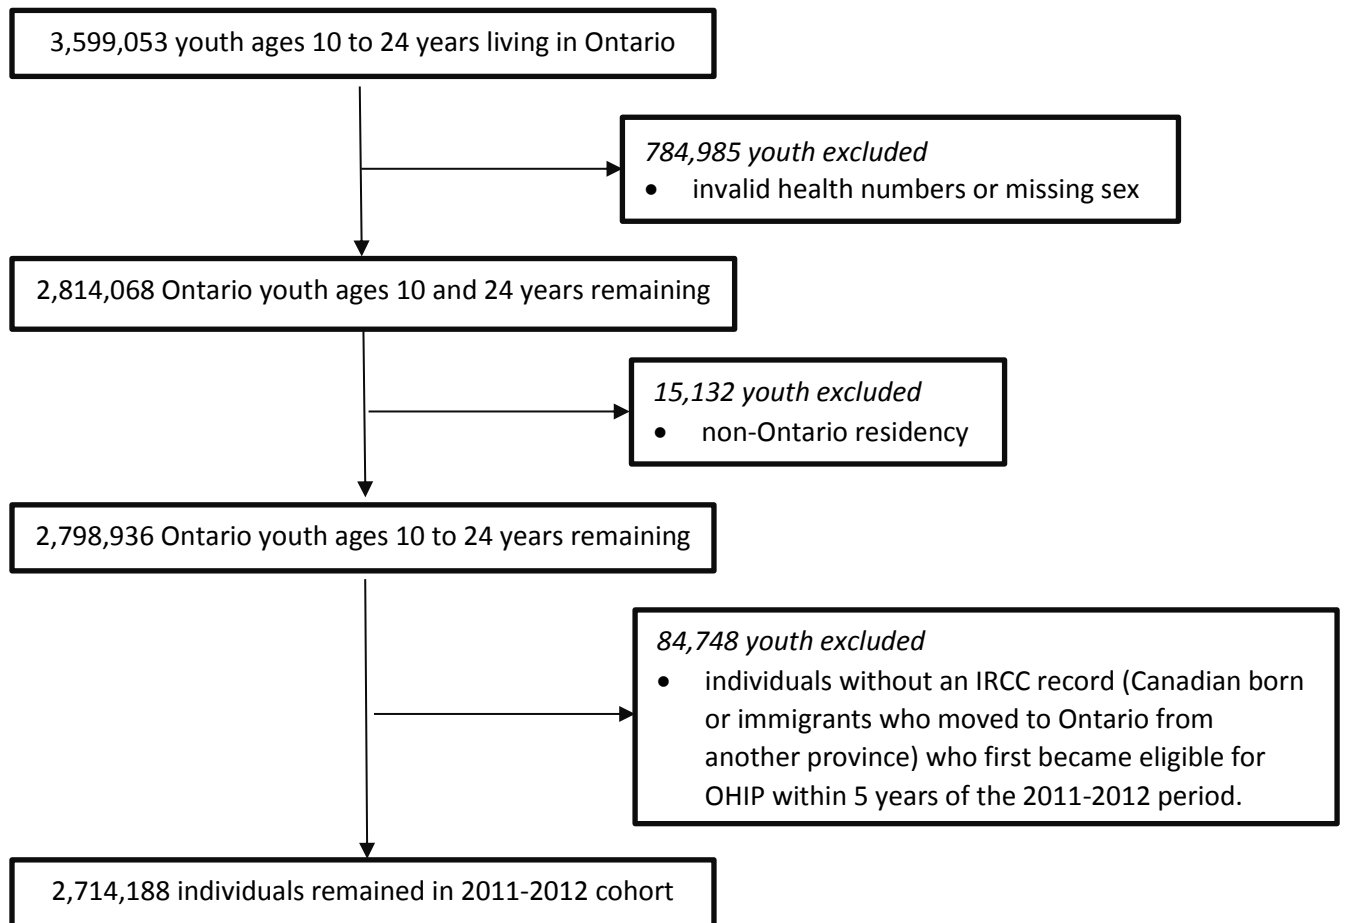

Supplementary Figure 1.

Supplement: bmjopen-2018-022647supp002.pdf [file bmjopen-2018-022647supp002.pdf]
